# Supplementary material for: Domino Knoevenagel condensation–Michael addition–cyclization for the diastereoselective synthesis of dihydrofuropyrido[2,3-d]pyrimidines via pyridinium ylides in water
Source: Royal Society of Chemistry journal article supplement (doi:10.1039/c3ra45795h), 2013-11-25

# Supporting Information

## Eco-friendly diastereoselective synthesis of dihydrofuropyrido[2,3-d]pyrimidines via pyridinium ylides in water

Somayeh Ahadi,<sup>a</sup> Telma Kamranifard,<sup>a</sup> Mahsa Armaghan,<sup>b</sup> Hamid Reza Khavasi<sup>a</sup> and Ayoob Bazgir<sup>\*a</sup>

<sup>a</sup>Department of Chemistry, Shahid Beheshti University G. C., Tehran 1983963113, Iran.

<sup>b</sup>Institute of Materials Research and Engineering, Agency for Science Technology and Research, 3 Research Link, S117602, Singapore  
Email: [a\\_bazgir@sbu.ac.ir](mailto:a_bazgir@sbu.ac.ir)

### Table of Contents:

|                                                              |         |
|--------------------------------------------------------------|---------|
| General methods                                              | S1      |
| Synthesis of starting materials                              | S2      |
| General procedure for the synthesis of <b>4</b> and <b>9</b> | S2-S12  |
| Copies of <sup>1</sup> H NMR and <sup>13</sup> C NMR spectra | S13-S48 |

### General methods

Melting points were measured on an Electrothermal 9100 apparatus and are uncorrected IR spectra were recorded using a BOMEM MB-Series. <sup>1</sup>H and <sup>13</sup>C NMR spectra was recorded on a BRUKER DRX-300 AVANCE spectrometer. Chemical shifts are expressed in parts per million downfield from tetramethylsilane as an internal standard. Elemental analyses for C, H and N performed using a Heraeus CHN–O–Rapid analyzer. MS spectra were recorded on a Shimadzu QP 1100EX mass spectrometer operating at an ionization potential of 70 eV.

**X-ray crystallography:** The X-ray diffraction measurements were made on a STOE IPDS-II diffractometer with graphite monochromated Mo-K $\alpha$  radiation. Cell constants and an orientation matrix for data collection were obtained by least-squares refinement of diffraction data from 4713 unique reflections for **4c**. Data were collected at a temperature of 298(2) K to a maximum 2 $\theta$  value of 54.00° and in a series of  $\omega$  scans in 1° oscillations and integrated using the Stoe X-AREA<sup>1</sup> software package. The data were corrected for Lorentz and Polarizing effects. The structures were solved by direct methods and refined on  $F^2$  by full-matrix least-squares procedure. All hydrogen atoms were added at ideal positions and constrained to ride on their parent atoms, with  $U_{iso}(H) = 1.2U_{eq}$ . All refinements were performed using the X-STEP32 crystallographic software package.<sup>2</sup> Complete crystallographic data for compound **4c** has been deposited with the Cambridge Crystallographic Data Centre as supplementary publication No. CCDC 955501. Copies of the data can be obtained free of charge on application to CCDC, 12 Union Road, Cambridge CB2 1EZ, U.K. Fax: 0044 1223 336 033. Email: [deposit@ccdc.cam.ac.uk](mailto:deposit@ccdc.cam.ac.uk)

[1] Stoe & Cie, X-AREA, version 1.30: Program for the acquisition and analysis of data; Stoe & Cie GmbH: Darmstadt, Germany (2009).

[2] Stoe & Cie, X-STEP32, Version 1.07b: Crystallographic package; Stoe & Cie GmbH: Darmstadt, Germany (2000).

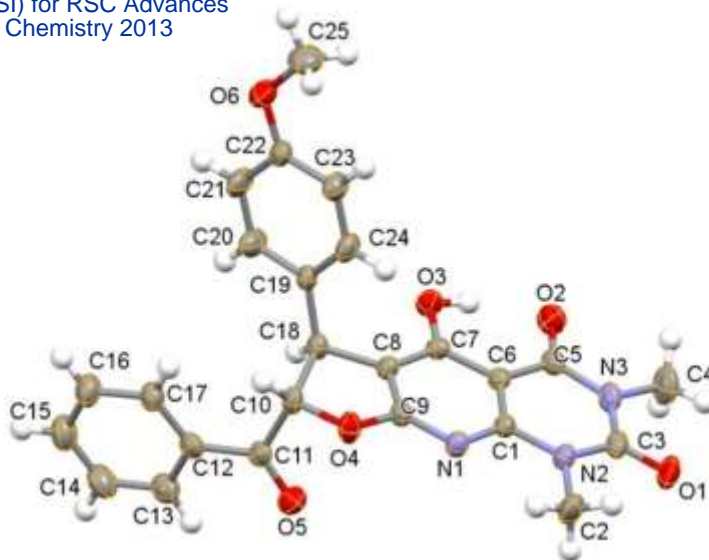

Fig. X-Ray crystal structure of **4c**

### Synthesis of starting material **1**:

A mixture of 6-amino-1,3-dimethylpyrimidine-2,4(1*H*,3*H*)-dione (1mmol) and diethyl malonate (4 mmol) was heated at 220 °C for 3h. Then, the precipitate washed with ethanol to produce pure product **1**.

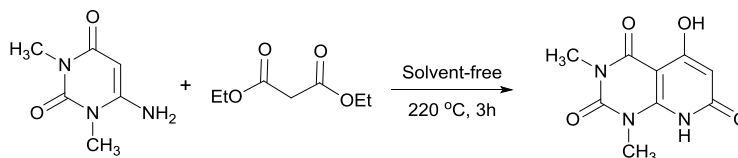

### Synthesis of starting material **3**:

A mixture of phenacyl bromide (1 mmol), pyridin (1.2 mmol) in MeCN (2 mL) in the presence of K<sub>2</sub>CO<sub>3</sub> (30 mol%) was refluxing for 2 h. Then the precipitated product was filtered and washed with MeCN to produce pure product.

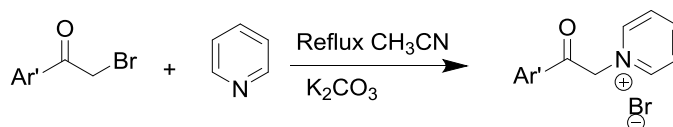

### General procedure for the synthesis of **4**

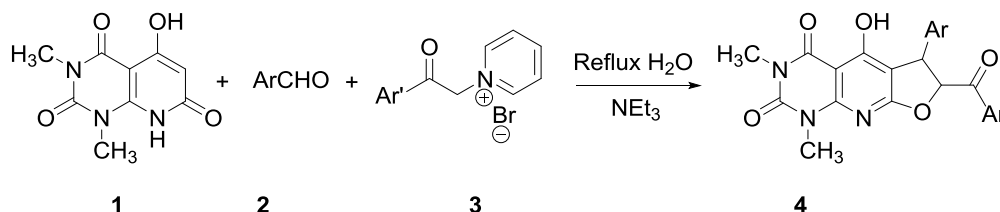

A mixture of 5-hydroxy-1,3-dimethylpyrido[2,3-*d*]pyrimidine-2,4,7(1*H*,3*H*,8*H*)-trione (1.0 mmol), aromatic aldehydes (1.0 mmol) and 1-(2-oxo-2-phenylethyl)pyridin-1-ium (1 mmol) in H<sub>2</sub>O (2 mL) in the presence of NEt<sub>3</sub>

(30 mol%) was refluxing for 48 h. After completion of the reaction (TLC), the reaction mixture was cooled to room temperature. Then, the precipitated product was filtered and washed with ethanol (5 ml) to afford the pure product **4**.

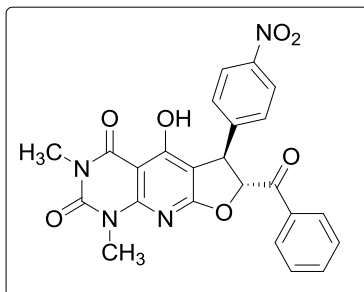

**7-benzoyl-5-hydroxy-1,3-dimethyl-6-(4-nitrophenyl)-6,7-dihydrofuro[3',2':5,6]pyrido[2,3-d]pyrimidine-2,4(1H,3H)-dione (4a)**

Brown powder (yield 97%); mp 198-205 °C. IR (KBr) ( $\nu_{\max}$  / $\text{cm}^{-1}$ ): 3379, 3051, 1678, 1600.  $^1\text{H}$  NMR (300 MHz,  $\text{DMSO-}d_6$ ):  $\delta_{\text{H}}$  (ppm) 3.30 (3H, s,  $\text{CH}_3$ ), 3.56 (3H, s,  $\text{CH}_3$ ), 5.04 (1H, d,  $J= 4.5$  Hz, CH), 5.99 (1H, d,  $J= 4.62$  Hz, CH), 7.39-7.60 (5H, m, H-Ar), 7.85 (2H, d,  $J= 7.61$  Hz, H-Ar), 8.14 (2H, d,  $J= 8.13$  Hz, H-Ar), 12.40 (1H, s, OH).  $^{13}\text{C}$  NMR (75 MHz,  $\text{DMSO-}d_6$ ):  $\delta_{\text{C}}$  (ppm) 28.2, 30.5, 46.5, 88.6, 93.8, 100.0, 119.1, 122.2, 125.0, 129.7, 130.0, 135.1, 136.2, 155.1, 155.7, 164.8, 172.2, 194.7. Anal. Calcd for  $\text{C}_{24}\text{H}_{18}\text{N}_4\text{O}_7$ : C, 60.76; H, 3.82; N, 11.81. Found: C, 60.69; H, 3.77; N, 11.87.

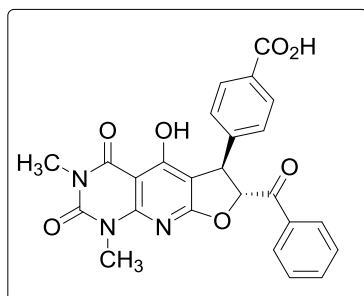

**7-benzoyl-5-hydroxy-1,3-dimethyl-2,4-dioxo-1,2,3,4,6,7-hexahydrofuro[3',2':5,6]pyrido[2,3-d]pyrimidin-6-yl)benzoic acid (4b)**

White powder (yield 60%); mp 227-233 °C. IR (KBr) ( $\nu_{\max}$  / $\text{cm}^{-1}$ ): 3313, 3075, 3099, 1714, 1666, 1621.  $^1\text{H}$  NMR (300 MHz,  $\text{DMSO-}d_6$ ):  $\delta_{\text{H}}$  (ppm) 3.22 (3H, s,  $\text{CH}_3$ ), 3.49 (3H, s,  $\text{CH}_3$ ), 4.92 (1H, bs, CH), 6.47 (1H, bs, CH), 7.33-7.79 (5H, m, H-Ar), 7.89-7.94 (4H, m, H-Ar), 12.64 (2H,

bs, 2OH).  $^{13}\text{C}$  NMR (75 MHz,  $\text{DMSO-}d_6$ ):  $\delta_{\text{C}}$  (ppm) 28.2, 30.6, 46.5, 88.7, 93.8, 100.9, 128.6, 129.8, 129.9, 130.7, 131.0, 134.3, 135.1, 145.7, 151.0, 154.0, 165.1, 166.0, 167.8, 171.8, 194.3. MS (EI, 70 eV)  $m/z$ : 473 ( $\text{M}^+$ ). Anal. Calcd for  $\text{C}_{25}\text{H}_{19}\text{N}_3\text{O}_7$ : C, 63.42; H, 4.05; N, 8.88. Found: C, 63.37; H, 4.09; N, 8.80.

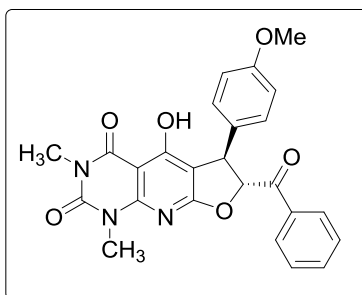

**7-benzoyl-5-hydroxy-6-(4-methoxyphenyl)-1,3-dimethyl-6,7-dihydrofuro[3',2':5,6]pyrido[2,3-*d*]pyrimidine-2,4(1*H*,3*H*)-dione (4c)**

Cream powder (yield 84%); mp 194-204 °C. IR (KBr) ( $\nu_{\text{max}}$  / $\text{cm}^{-1}$ ): 3598, 1701, 1633.  $^1\text{H}$  NMR (300 MHz,  $\text{DMSO-}d_6$ ):  $\delta_{\text{H}}$  (ppm) 3.22 (3H, s,  $\text{CH}_3$ ), 3.48 (3H, s,  $\text{CH}_3$ ), 3.73 (3H, s,  $\text{OCH}_3$ ), 4.70 (1H, bs, CH), 6.36 (1H, bs, CH), 6.91 (2H, bs, H-Ar), 7.10 (2H, bs, H-Ar), 7.54 (2H, bs, H-Ar), 7.70 (1H, bs, H-Ar), 7.87 (2H, bs, H-Ar), 12.40 (1H, s, OH).  $^{13}\text{C}$  NMR (75 MHz,  $\text{DMSO-}d_6$ ):  $\delta_{\text{C}}$  (ppm) 28.2, 30.5, 46.3, 56.0, 89.4, 93.7, 101.5, 115.1, 129.3, 129.8, 132.9, 134.2, 135.1, 151.0, 153.8, 159.5, 165.0, 166.0, 171.8, 194.5. MS (EI, 70 eV)  $m/z$ : 459 ( $\text{M}^+$ ). Anal. Calcd for  $\text{C}_{25}\text{H}_{21}\text{N}_3\text{O}_6$ : C, 65.35; H, 4.61; N, 9.15. Found: C, 65.73; H, 4.56; N, 9.21.

Crystal data for **4c**  $\text{C}_{25}\text{H}_{21}\text{N}_3\text{O}_6$  (CCDC 955501):  $M = 459.45$  g/mol, monoclinic system, space group P21/a,  $a = 9.6442(12)$  Å,  $b = 14.0350(13)$  Å,  $c = 15.9534(18)$  Å,  $\beta = 91.025(9)^\circ$ ,  $V = 2159.0(4)$  Å<sup>3</sup>,  $Z = 4$ ,  $D_c = 1.413$  g. $\text{cm}^{-3}$ ,  $\mu(\text{Mo-K}\alpha) = 0.103$  mm<sup>-1</sup>, crystal dimension of 0.25 x 0.20 x 0.15 mm. The structure was solved by using SHELXS. The structure refinement and data reduction was carried out with SHELXL of the X-Step32 suite of programs. The non-hydrogen atoms were refined anisotropically by full matrix least-squares on  $F^2$  values to final  $R_1 = 0.0641$ ,  $wR_2 = 0.1675$  and  $S = 0.958$  with 313 parameters using 4713 independent reflection ( $\theta$  range = 1.93 – 27.00°). Hydrogen atoms were located from expected geometry and were not refined.

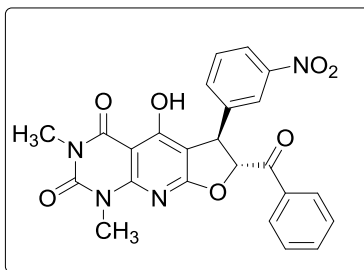

**7-benzoyl-5-hydroxy-1,3-dimethyl-6-(3-nitrophenyl)-6,7-dihydrofuro[3',2':5,6]pyrido[2,3-d]pyrimidine-2,4(1H,3H)-dione (4d)**

Cream powder (yield 81%); mp 187-194 °C. IR (KBr) ( $\nu_{\max}$  / $\text{cm}^{-1}$ ): 3452, 1708, 1624.  $^1\text{H}$  NMR (300 MHz,  $\text{DMSO-}d_6$ ):  $\delta_{\text{H}}$  (ppm) 3.22 (3H, s,  $\text{CH}_3$ ), 3.48 (3H, s,  $\text{CH}_3$ ), 5.14 (1H, bs, CH), 6.53 (1H, bs, CH), 7.54-7.70 (5H, m, H-Ar), 7.91 (2H, d,  $J= 7.08$  Hz, H-Ar), 8.08 (1H, bs, H-Ar), 8.18 (1H, d,  $J= 6.23$  Hz, H-Ar), 12.47 (1H, s, OH).  $^{13}\text{C}$  NMR (75 MHz,  $\text{DMSO-}d_6$ ):  $\delta_{\text{C}}$  (ppm) 28.2, 30.6, 45.9, 88.3, 93.7, 100.6, 123.2, 123.4, 129.7, 130.0, 131.2, 131.2, 134.5, 135.1, 142.9, 165.1, 171.7, 194.1. MS (EI, 70 eV)  $m/z$ : 474 ( $\text{M}^+$ ). Anal. Calcd for  $\text{C}_{24}\text{H}_{18}\text{N}_4\text{O}_7$ : C, 60.76; H, 3.82; N, 11.81. Found: C, 60.70; H, 3.78; N, 11.76.

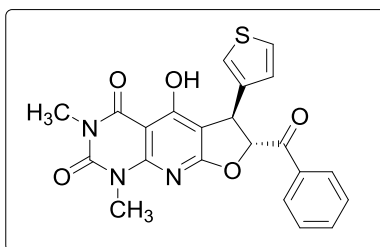

**7-benzoyl-5-hydroxy-1,3-dimethyl-6-(thiophen-3-yl)-6,7-dihydrofuro[3',2':5,6]pyrido[2,3-d]pyrimidine-2,4(1H,3H)-dione (4e)**

Light cream powder (yield 100%); mp 185 °C (dec). IR (KBr) ( $\nu_{\max}$  / $\text{cm}^{-1}$ ): 3635, 1705, 1671, 1621.  $^1\text{H}$  NMR (300 MHz,  $\text{DMSO-}d_6$ ):  $\delta_{\text{H}}$  (ppm) 3.23 (3H, s,  $\text{CH}_3$ ), 3.48 (3H, s,  $\text{CH}_3$ ), 5.14 (1H, bs, CH), 6.44 (1H, bs, CH), 7.00 (2H, bs, H-Ar), 7.47-7.73 (4H, m, H-Ar), 7.96 (2H, d,  $J= 4.67$  Hz, H-Ar), 12.56 (1H, s, OH).  $^{13}\text{C}$  NMR (75 MHz,  $\text{DMSO-}d_6$ ):  $\delta_{\text{C}}$  (ppm) 28.2, 30.6, 41.9, 89.1, 93.7, 101.2, 126.4, 128.1, 129.9, 134.1, 135.2, 143.9, 151.0, 154.3, 163.2, 165.3, 166.0, 171.5, 194.1. MS (EI, 70 eV)  $m/z$ : 435 ( $\text{M}^+$ ). Anal. Calcd for  $\text{C}_{22}\text{H}_{17}\text{N}_3\text{O}_5\text{S}$ : C, 60.68; H, 3.94; N, 9.65. Found: C, 60.78; H, 3.87; N, 9.73.

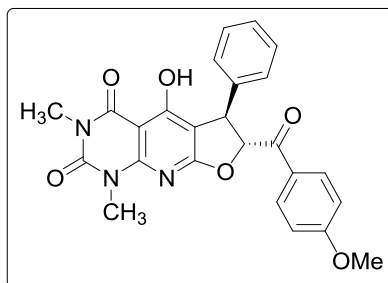

**5-hydroxy-7-(4-methoxybenzoyl)-1,3-dimethyl-6-phenyl-6,7-dihydrofuro[3',2':5,6]pyrido[2,3-d]pyrimidine-2,4(1*H*,3*H*)-dione (4f)**

Cream powder (yield 59%); mp 211 °C D. IR (KBr) ( $\nu_{\max}$  / $\text{cm}^{-1}$ ): 3531, 1709, 1671, 1678, 1615.  $^1\text{H}$  NMR (300 MHz,  $\text{DMSO-}d_6$ ):  $\delta_{\text{H}}$  (ppm) 3.22 (3H, s,  $\text{CH}_3$ ), 3.49 (3H, s,  $\text{CH}_3$ ), 3.85 (3H, s,  $\text{OCH}_3$ ), 4.75 (1H, bs, CH), 6.37 (1H, bs, CH), 7.06-7.34 (7H, m, H-Ar), 7.86 (2H, bs, H-Ar), 12.35 (1H, bs, OH). MS (EI, 70 eV)  $m/z$ : 459 ( $\text{M}^+$ ). Anal. Calcd for  $\text{C}_{25}\text{H}_{21}\text{N}_3\text{O}_6$ : C, 65.35; H, 4.61; N, 9.15. Found: C, 65.26; H, 4.67; N, 9.06.

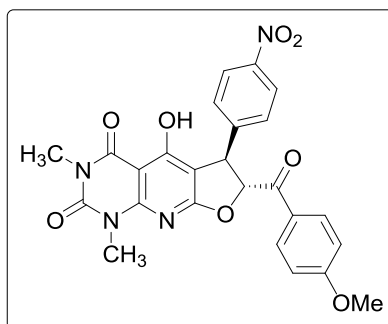

**5-hydroxy-7-(4-methoxybenzoyl)-1,3-dimethyl-6-(4-nitrophenyl)-6,7-dihydrofuro[3',2':5,6]pyrido[2,3-d]pyrimidine-2,4(1*H*,3*H*)-dione (4g)**

Yellow powder (yield 60%); mp 195-200 °C. IR (KBr) ( $\nu_{\max}$  / $\text{cm}^{-1}$ ): 3602, 1704, 1672, 1625.  $^1\text{H}$  NMR (300 MHz,  $\text{DMSO-}d_6$ ):  $\delta_{\text{H}}$  (ppm) 3.22 (3H, s,  $\text{CH}_3$ ), 3.48 (3H, s,  $\text{CH}_3$ ), 3.85 (3H, s,  $\text{OCH}_3$ ), 5.04 (1H, bs, CH), 6.46 (1H, bs, CH), 7.08 (2H, d,  $J = 8.21$  Hz, H-Ar), 7.53 (2H, d,  $J = 7.76$  Hz, H-Ar), 7.89 (2H, d,  $J = 7.92$  Hz, H-Ar), 8.23 (2H, d,  $J = 7.60$  Hz, H-Ar), 12.44 (1H, s, OH).  $^{13}\text{C}$  NMR (75 MHz,  $\text{DMSO-}d_6$ ):  $\delta_{\text{C}}$  (ppm) 28.2, 30.6, 46.3, 56.6, 88.1, 93.8, 100.7, 115.2, 124.8, 127.0, 129.9, 132.4, 147.8, 148.4, 151.0, 154.1, 165.0, 166.0, 192.2. MS (EI, 70 eV)  $m/z$ : 504 ( $\text{M}^+$ ). Anal. Calcd for  $\text{C}_{25}\text{H}_{20}\text{N}_4\text{O}_8$ : C, 59.52; H, 4.00; N, 11.11. Found: C, 59.61; H, 4.07; N, 11.07.

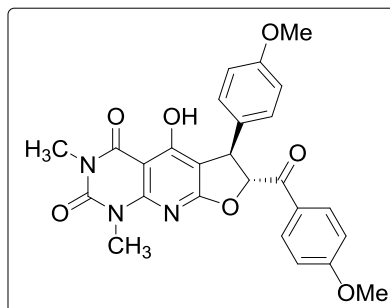

**5-hydroxy-7-(4-methoxybenzoyl)-6-(4-methoxyphenyl)-1,3-dimethyl-6,7-dihydrofuro[3',2':5,6]pyrido[2,3-*d*]pyrimidine-2,4(1*H*,3*H*)-dione (4h)**

Yellow powder (yield 94%); mp 163-170 °C. IR (KBr) ( $\nu_{\max}$  / $\text{cm}^{-1}$ ): 3501, 1704, 1624.  $^1\text{H}$  NMR (300 MHz,  $\text{DMSO-}d_6$ ):  $\delta_{\text{H}}$  (ppm) 3.22 (3H, s,  $\text{CH}_3$ ), 3.33 (3H, s,  $\text{CH}_3$ ), 3.49 (3H, s,  $\text{OCH}_3$ ), 3.85 (3H, s,  $\text{OCH}_3$ ), 4.68 (1H, bs, CH), 6.32 (1H, bs, CH), 6.91 (2H, d,  $J = 8.02$  Hz, H-Ar), 7.06-7.15 (4H, m, H-Ar), 7.86 (2H, d,  $J = 8.47$  Hz, H-Ar), 12.40 (1H, s, OH). MS (EI, 70 eV)  $m/z$ : 489 ( $\text{M}^+$ ). Anal. Calcd for  $\text{C}_{26}\text{H}_{23}\text{N}_3\text{O}_7$ : C, 63.80; H, 4.74; N, 8.58. Found: C, 63.74; H, 4.70; N, 8.52.

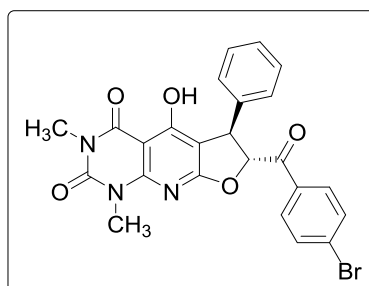

**7-(4-bromobenzoyl)-5-hydroxy-1,3-dimethyl-6-phenyl-6,7-dihydrofuro[3',2':5,6]pyrido[2,3-*d*]pyrimidine-2,4(1*H*,3*H*)-dione (4i)**

Cream powder (yield 60%); mp 202-210 °C. IR (KBr) ( $\nu_{\max}$  / $\text{cm}^{-1}$ ): 3075, 1706, 1670, 1628.  $^1\text{H}$  NMR (300 MHz,  $\text{DMSO-}d_6$ ):  $\delta_{\text{H}}$  (ppm) 3.22 (3H, s,  $\text{CH}_3$ ), 3.48 (3H, s,  $\text{CH}_3$ ), 4.82 (1H, d,  $J = 2.76$  Hz, CH), 6.41 (1H, d,  $J = 2.97$  Hz, CH), 7.21 (2H, d,  $J = 6.75$  Hz, H-Ar), 7.30-7.36 (3H, m, H-Ar), 7.76-7.83 (4H, d, m, H-Ar), 12.42 (1H, s, OH).  $^{13}\text{C}$  NMR (75 MHz,  $\text{DMSO-}d_6$ ):  $\delta_{\text{C}}$  (ppm) 28.2, 30.6, 46.5, 89.1, 93.8, 101.3, 128.2, 128.4, 129.3, 129.7, 131.8, 132.8, 133.4, 140.9, 151.0,

153.9, 165.1, 166.1, 171.8, 193.8. MS (EI, 70 eV)  $m/z$ : 509 ( $M^+$ ,  $^{81}\text{Br}$ ), 507 ( $M^+$ ,  $^{79}\text{Br}$ ). Anal. Calcd for  $\text{C}_{24}\text{H}_{18}\text{BrN}_3\text{O}_5$ : C, 56.71; H, 3.57; N, 8.27. Found: C, 56.63; H, 3.63; N, 8.34.

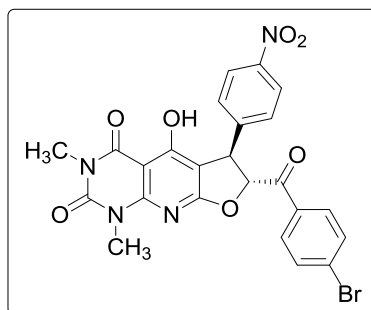

**7-(4-bromobenzoyl)-5-hydroxy-1,3-dimethyl-6-(4-nitrophenyl)-6,7-dihydrofuro[3',2':5,6]pyrido[2,3-d]pyrimidine-2,4(1H,3H)-dione (4j)**

Cream powder (yield 80%); mp 259 °C (dec). IR (KBr) ( $\nu_{\text{max}}$  / $\text{cm}^{-1}$ ): 3383, 1699, 1666, 1618.  $^1\text{H}$  NMR (300 MHz,  $\text{DMSO-}d_6$ ):  $\delta_{\text{H}}$  (ppm) 3.22 (3H, s,  $\text{CH}_3$ ), 3.48 (3H, s,  $\text{CH}_3$ ), 5.11 (1H, d,  $J = 3.12$  Hz, CH), 6.49 (1H, d,  $J = 3.21$  Hz, CH), 7.53 (2H, d,  $J = 8.13$  Hz, H-Ar), 7.77-7.85 (4H, m, H-Ar), 8.23 (2H, d,  $J = 7.98$  Hz, H-Ar), 12.46 (1H, s, OH).  $^{13}\text{C}$  NMR (75 MHz,  $\text{DMSO-}d_6$ ):  $\delta_{\text{C}}$  (ppm) 28.2, 30.6, 45.9, 88.3, 93.8, 100.6, 124.8, 129.4, 129.9, 131.9, 132.9, 133.4, 147.8, 148.3, 151.0, 154.1, 165.2, 166.0, 171.6, 193.3. MS (EI, 70 eV)  $m/z$ : 554 ( $M^+$ ,  $^{81}\text{Br}$ ), 552 ( $M^+$ ,  $^{79}\text{Br}$ ). Anal. Calcd for  $\text{C}_{24}\text{H}_{17}\text{BrN}_4\text{O}_7$ : C, 52.10; H, 3.10; N, 10.13. Found: C, 52.05; H, 3.06; N, 10.05.

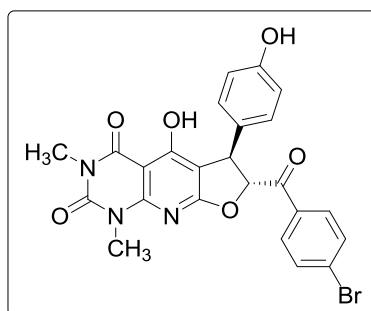

**7-(4-bromobenzoyl)-5-hydroxy-6-(4-hydroxyphenyl)-1,3-dimethyl-6,7-dihydrofuro[3',2':5,6]pyrido[2,3-d]pyrimidine-2,4(1H,3H)-dione (4k)**

Cream powder (yield 63%); mp 260 °C (dec). IR (KBr) ( $\nu_{\text{max}}$  / $\text{cm}^{-1}$ ): 3343, 1705, 1657, 1615.  $^1\text{H}$  NMR (300 MHz,  $\text{DMSO-}d_6$ ):  $\delta_{\text{H}}$  (ppm) 3.21 (3H, s,  $\text{CH}_3$ ), 3.47 (3H, s,  $\text{CH}_3$ ), 4.64 (1H, bs, CH), 6.31 (1H, bs, CH), 6.70 (2H, bs, H-Ar), 6.97 (2H, bs, H-Ar), 7.78 (4H, bs, H-Ar), 9.44 (1H, s, OH), 12.36 (1H, bs, OH).  $^{13}\text{C}$  NMR (75 MHz,  $\text{DMSO-}d_6$ ):  $\delta_{\text{C}}$  (ppm) 28.2, 30.5, 46.2, 89.5, 93.8,



101.6, 116.5, 129.2, 131.2, 131.7, 132.8, 133.3, 151.1, 153.8, 157.7, 165.0, 166.1, 171.8, 194.0.  
MS (EI, 70 eV)  $m/z$ : 525 ( $M^+$ ,  $^{81}\text{Br}$ ), 523 ( $M^+$ ,  $^{79}\text{Br}$ ). Anal. Calcd for  $\text{C}_{24}\text{H}_{18}\text{BrN}_3\text{O}_6$ : C, 54.98; H, 3.46; N, 8.01. Found: C, 54.91; H, 3.41; N, 7.94.

\*Due to very low solubility of the products **9**, we can not report the  $^{13}\text{C}$  NMR data for these products.

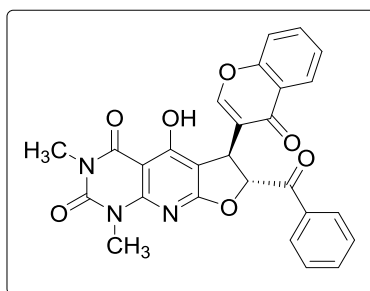

**7-benzoyl-5-hydroxy-1,3-dimethyl-6-(4-oxo-4H-chromen-3-yl)-6,7-dihydrofuro[3',2':5,6]pyrido[2,3-d]pyrimidine-2,4(1H,3H)-dione (9a)**

Cream powder (yield 70%); mp 260 °C (dec). IR (KBr) ( $\nu_{\text{max}}$  / $\text{cm}^{-1}$ ): 3065, 1686, 1635.  $^1\text{H}$  NMR (300 MHz,  $\text{DMSO}-d_6$ ):  $\delta_{\text{H}}$  (ppm) 3.45 (6H, s, 2 $\text{CH}_3$ ), 4.85 (1H, bs, CH), 6.37 (1H, bs, CH), 7.54-7.76 (6H, m, H-Ar), 7.97 (3H, bs, H-Ar), 8.27 (1H, bs, H-Ar), 12.42 (1H, bs, OH). MS (EI, 70 eV)  $m/z$ : 497 ( $M^+$ ). Anal. Calcd for  $\text{C}_{27}\text{H}_{19}\text{N}_3\text{O}_7$ : C, 65.19; H, 3.85; N, 8.45. Found: C, 65.09; H, 3.79; N, 8.52.

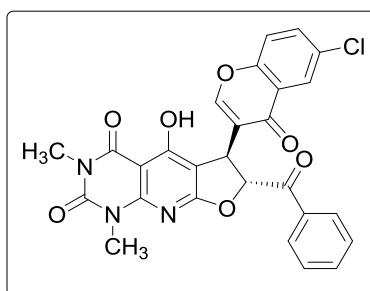

**7-benzoyl-6-(6-chloro-4-oxo-4H-chromen-3-yl)-5-hydroxy-1,3-dimethyl-6,7-dihydrofuro[3',2':5,6]pyrido[2,3-d]pyrimidine-2,4(1H,3H)-dione (9b)**

Cream powder (yield 60%); mp 237-245 °C. IR (KBr) ( $\nu_{\max}$  / $\text{cm}^{-1}$ ): 3428, 1708, 1676, 1632.  $^1\text{H}$  NMR (300 MHz,  $\text{DMSO-}d_6$ ):  $\delta_{\text{H}}$  (ppm) 3.23(3H, s,  $\text{CH}_3$ ), 3.46 (3H, s,  $\text{CH}_3$ ), 4.87 (1H, bs, CH) 6.38 (1H, bs, CH), 7.22-7.99 (8H, m, H-Ar), 8.35 (1H, bs, H-Ar), 12.35 (1H, bs, OH). MS (EI, 70 eV)  $m/z$ : 532 ( $\text{M}^+$ ). Anal. Calcd for  $\text{C}_{28}\text{H}_{21}\text{N}_3\text{O}_7$ : C, 60.97; H, 3.41; N, 7.90. Found: C, 60.90; H, 3.48; N, 7.99.

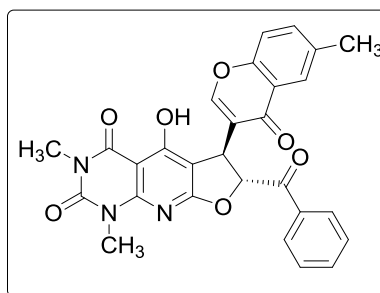

**7-benzoyl-5-hydroxy-1,3-dimethyl-6-(6-methyl-4-oxo-4H-chromen-3-yl)-6,7-dihydrofuro[3',2':5,6]pyrido[2,3-d]pyrimidine-2,4(1H,3H)-dione (9c)**

Cream powder (yield 100%); mp >260 °C. IR (KBr) ( $\nu_{\max}$  / $\text{cm}^{-1}$ ): 3467, 1710, 1618.  $^1\text{H}$  NMR (300 MHz,  $\text{DMSO-}d_6$ ):  $\delta_{\text{H}}$  (ppm) 2.40 (3H, s,  $\text{CH}_3$ ), 3.38 (3H, s,  $\text{CH}_3$ ), 3.47 (3H, s,  $\text{CH}_3$ ), 4.86 (1H, bs, CH), 6.37 (1H, bs, CH), 7.56-7.78 (6H, m, H-Ar), 8.01 (2H, d,  $J = 6.09$  Hz, H-Ar), 8.26 (1H, bs, H-Ar), 12.39 (1H, bs, OH). MS (EI, 70 eV)  $m/z$ : 511 ( $\text{M}^+$ ). Anal. Calcd for  $\text{C}_{28}\text{H}_{21}\text{N}_3\text{O}_7$ : C, 65.75; H, 4.14; N, 8.22. Found: C, 65.82; H, 4.19; N, 8.16.

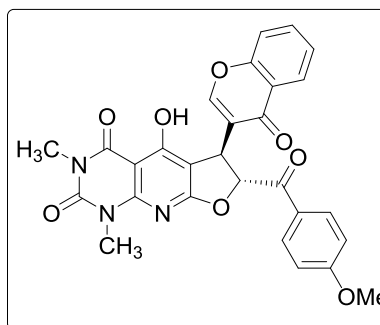

**5-hydroxy-7-(4-methoxybenzoyl)-1,3-dimethyl-6-(4-oxo-4H-chromen-3-yl)-6,7-dihydrofuro[3',2':5,6]pyrido[2,3-d]pyrimidine-2,4(1H,3H)-dione (9d)**

Light cream powder (yield 85%); mp 243 °C (dec). IR (KBr) ( $\nu_{\max}$  / $\text{cm}^{-1}$ ): 3087, 1700, 1670, 1636, 1608.  $^1\text{H}$  NMR (300 MHz,  $\text{DMSO-}d_6$ ):  $\delta_{\text{H}}$  (ppm) 3.23 (3H, s,  $\text{CH}_3$ ), 3.47 (3H, s,  $\text{CH}_3$ ), 3.85 (3H, s,  $\text{CH}_3$ ), 4.83 (1H, bs, CH), 6.34 (1H, bs, CH), 7.08 (2H, d,  $J = 6.78$  Hz, H-Ar), 7.49 (1H, bs,

H-Ar), 7.66 (1H, bs, H-Ar), 7.81 (1H, bs, H-Ar), 7.99 (3H, bs, H-Ar), 8.32 (1H, bs, H-Ar), 12.30 (1H, bs, OH). MS (EI, 70 eV)  $m/z$ : 527 ( $M^+$ ). Anal. Calcd for  $C_{28}H_{21}N_3O_8$ : C, 63.76; H, 4.01; N, 7.97. Found: C, 63.69; H, 3.96; N, 7.91.

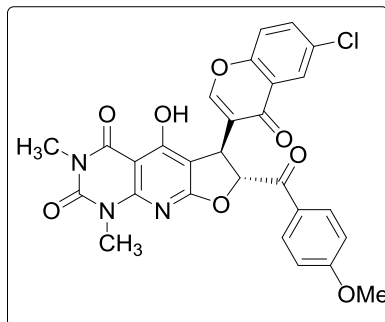

**6-(6-chloro-4-oxo-4H-chromen-3-yl)-5-hydroxy-7-(4-methoxybenzoyl)-1,3-dimethyl-6,7-dihydrofuro[3',2':5,6]pyrido[2,3-d]pyrimidine-2,4(1H,3H)-dione (9e)**

Cream powder (yield 90%); mp 244 °C (dec). IR (KBr) ( $\nu_{\max}$  / $\text{cm}^{-1}$ ): 3075, 1697, 1674, 1646, 1600.  $^1\text{H}$  NMR (300 MHz,  $\text{DMSO}-d_6$ ):  $\delta_{\text{H}}$  (ppm) 3.27 (3H, s,  $\text{CH}_3$ ), 3.51 (3H, s,  $\text{CH}_3$ ), 3.88 (3H, s,  $\text{CH}_3$ ), 4.93 (1H, d,  $J=4.74$  Hz, CH), 6.24 (1H, d,  $J=4.62$  Hz, CH), 7.09 (2H, d,  $J=7.45$  Hz, H-Ar), 7.68-7.84 (2H, m, H-Ar), 7.97-8.02 (4H, m, H-Ar), 8.25 (1H, s, H-Ar), 12.40 (1H, bs, OH). MS (EI, 70 eV)  $m/z$ : 562 ( $M^+$ ). Anal. Calcd for  $C_{28}H_{20}ClN_3O_8$ : C, 59.85; H, 3.59; N, 7.48. Found: C, 59.94; H, 3.52; N, 7.53.

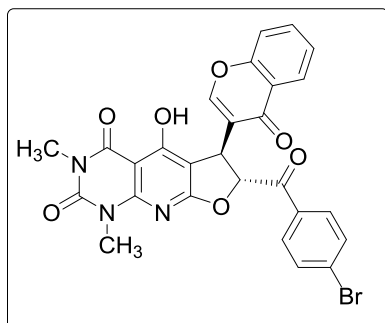

**7-(4-bromobenzoyl)-5-hydroxy-1,3-dimethyl-6-(4-oxo-4H-chromen-3-yl)-6,7-dihydrofuro[3',2':5,6]pyrido[2,3-d]pyrimidine-2,4(1H,3H)-dione (9f)**

Cream powder (yield 60%); mp >260 °C. IR (KBr) ( $\nu_{\max}$  / $\text{cm}^{-1}$ ): 3428, 3075, 1690, 1624.  $^1\text{H}$  NMR (300 MHz,  $\text{DMSO}-d_6$ ):  $\delta_{\text{H}}$  (ppm) 2.78 (3H, s,  $\text{CH}_3$ ), 3.03 (3H, s,  $\text{CH}_3$ ), 4.38 (1H, d,  $J=4.38$  Hz, CH), 5.95 (1H, d,  $J=3.54$  Hz, CH), 6.94-7.07 (2H, m, H-Ar), 7.24-7.28 (3H, m, H-Ar), 7.48-

7.57 (3H, m, H-Ar), 7.89 (1H, s, H-Ar), 11.79 (1H, bs, OH). MS (EI, 70 eV)  $m/z$ : 577 ( $M^+$ ,  $^{81}\text{Br}$ ), 575 ( $M^+$ ,  $^{79}\text{Br}$ ). Anal. Calcd for  $\text{C}_{27}\text{H}_{18}\text{BrN}_3\text{O}_7$ : C, 56.27; H, 3.15; N, 7.29. Found: C, 56.17; H, 3.08; N, 7.21.

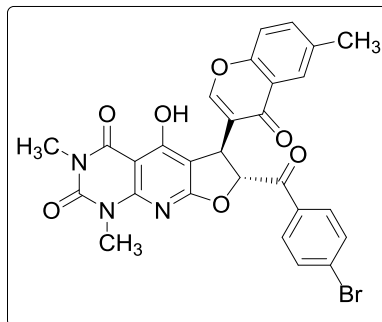

**7-(4-bromobenzoyl)-5-hydroxy-1,3-dimethyl-6-(6-methyl-4-oxo-4H-chromen-3-yl)-6,7-dihydrofuro[3',2':5,6]pyrido[2,3-d]pyrimidine-2,4(1H,3H)-dione (9g)**

Brown powder (yield 65%); mp 245 °C (dec). IR (KBr) ( $\nu_{\text{max}}$  / $\text{cm}^{-1}$ ): 3464, 1698, 1675, 1637.  $^1\text{H}$  NMR (300 MHz,  $\text{DMSO}-d_6$ ):  $\delta_{\text{H}}$  (ppm) 2.39 (3H, s,  $\text{CH}_3$ ), 3.22 (3H, s,  $\text{CH}_3$ ), 3.47 (3H, s,  $\text{CH}_3$ ), 4.81 (1H, bs, CH), 6.37 (1H, bs, CH), 7.58-7.69 (2H, m, H-Ar), 7.79 (3H, bs, H-Ar), 7.91-7.93 (2H, m, H-Ar), 8.28 (1H, bs, H-Ar), 12.44 (1H, bs, OH). MS (EI, 70 eV)  $m/z$ : 591 ( $M^+$ ,  $^{81}\text{Br}$ ), 589 ( $M^+$ ,  $^{79}\text{Br}$ ). Anal. Calcd for  $\text{C}_{28}\text{H}_{20}\text{BrN}_3\text{O}_7$ : C, 56.96; H, 3.41; N, 7.12. Found: C, 56.84; H, 3.48; N, 7.02.

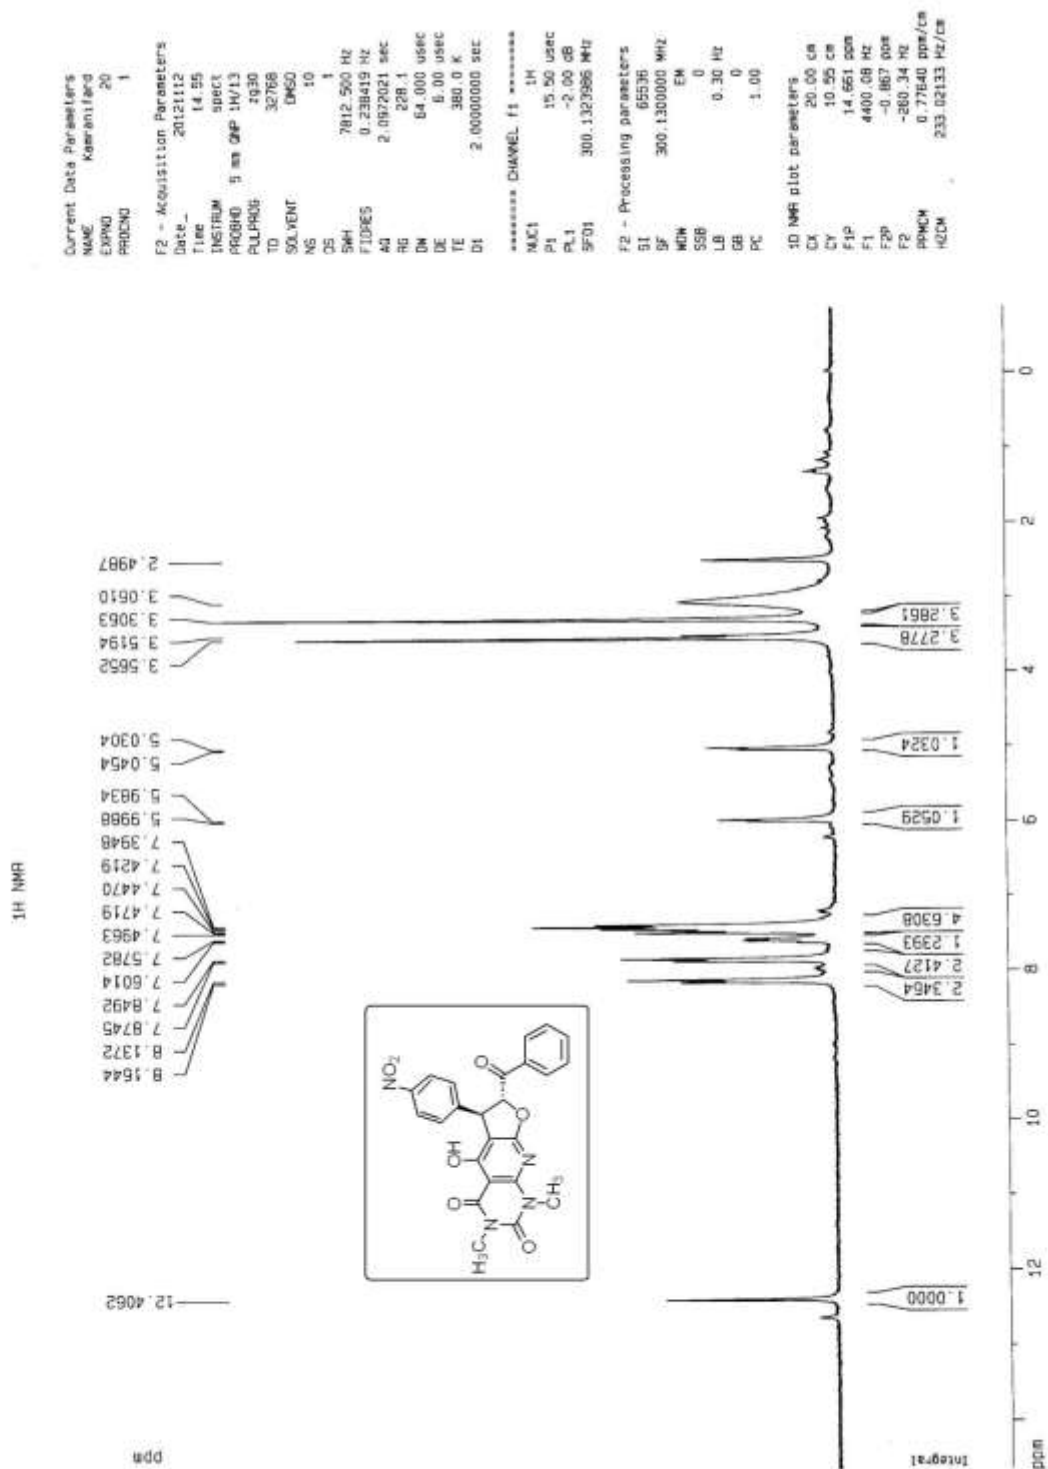

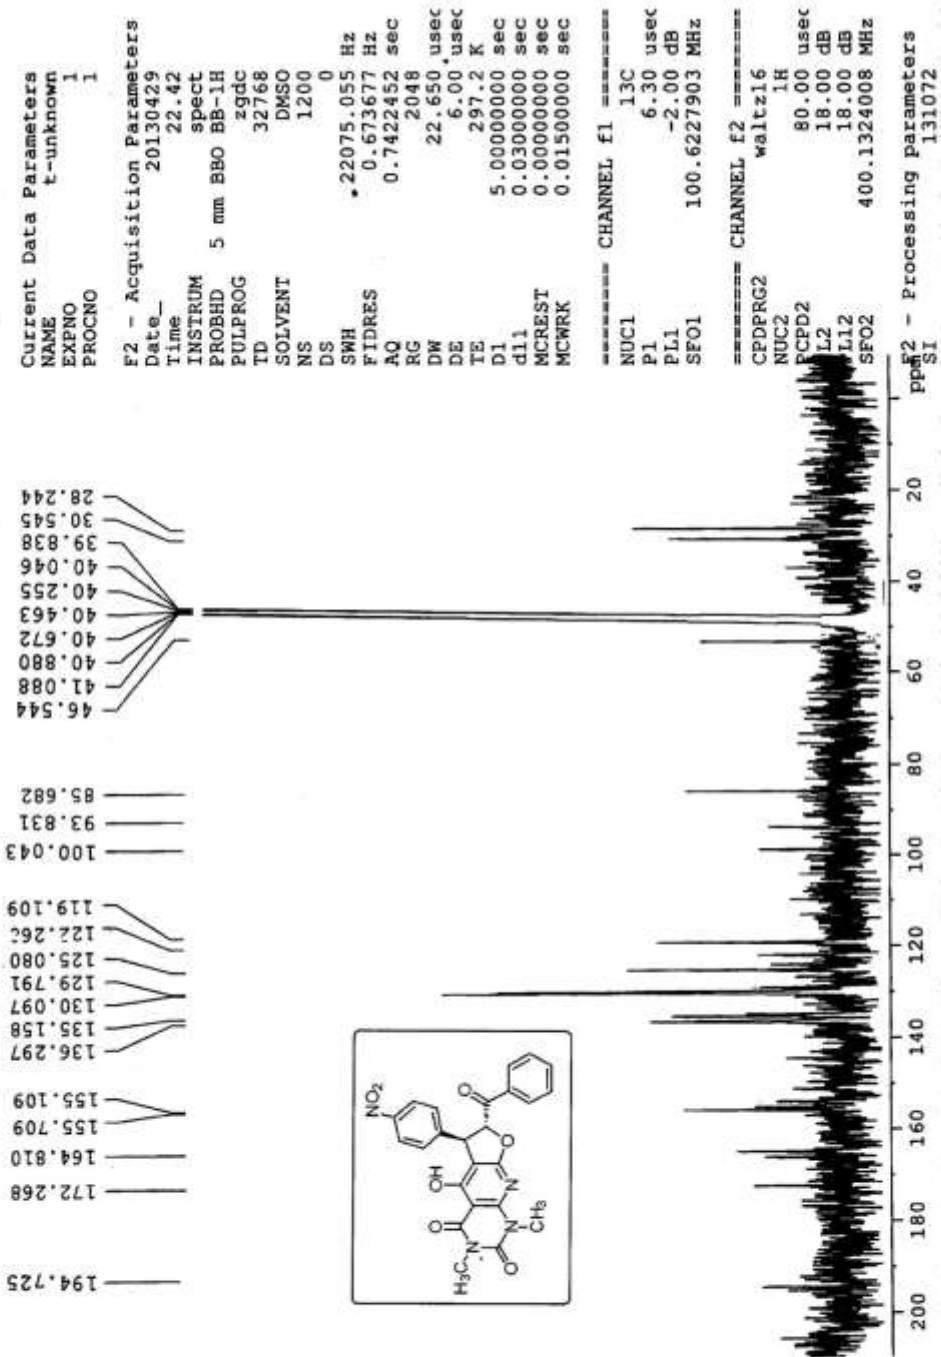

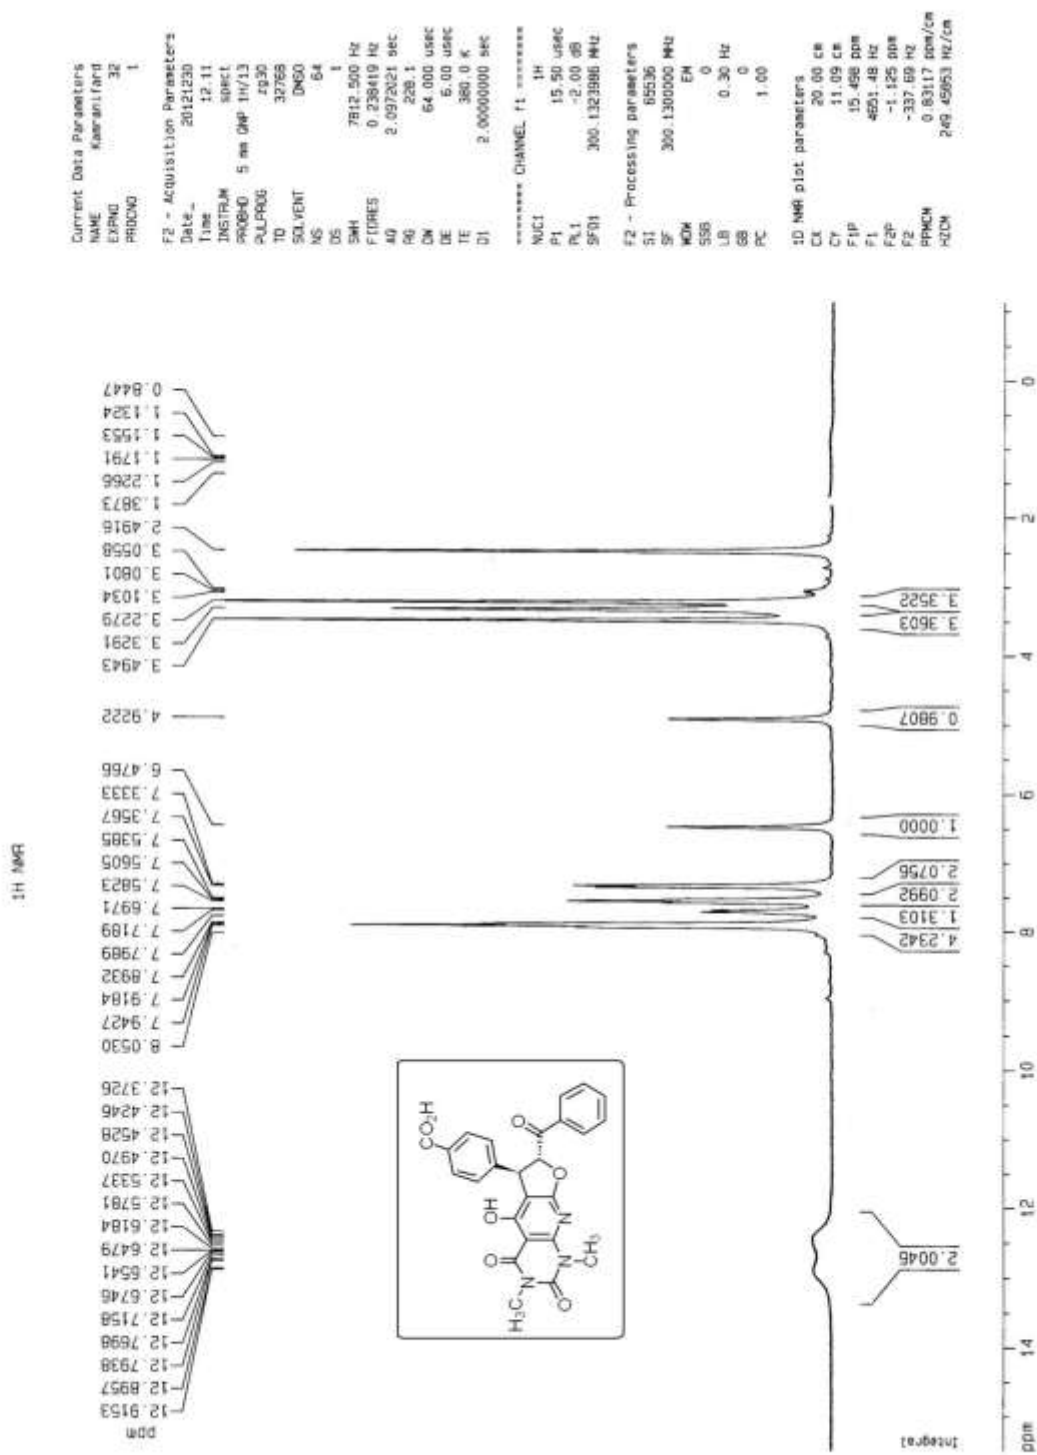

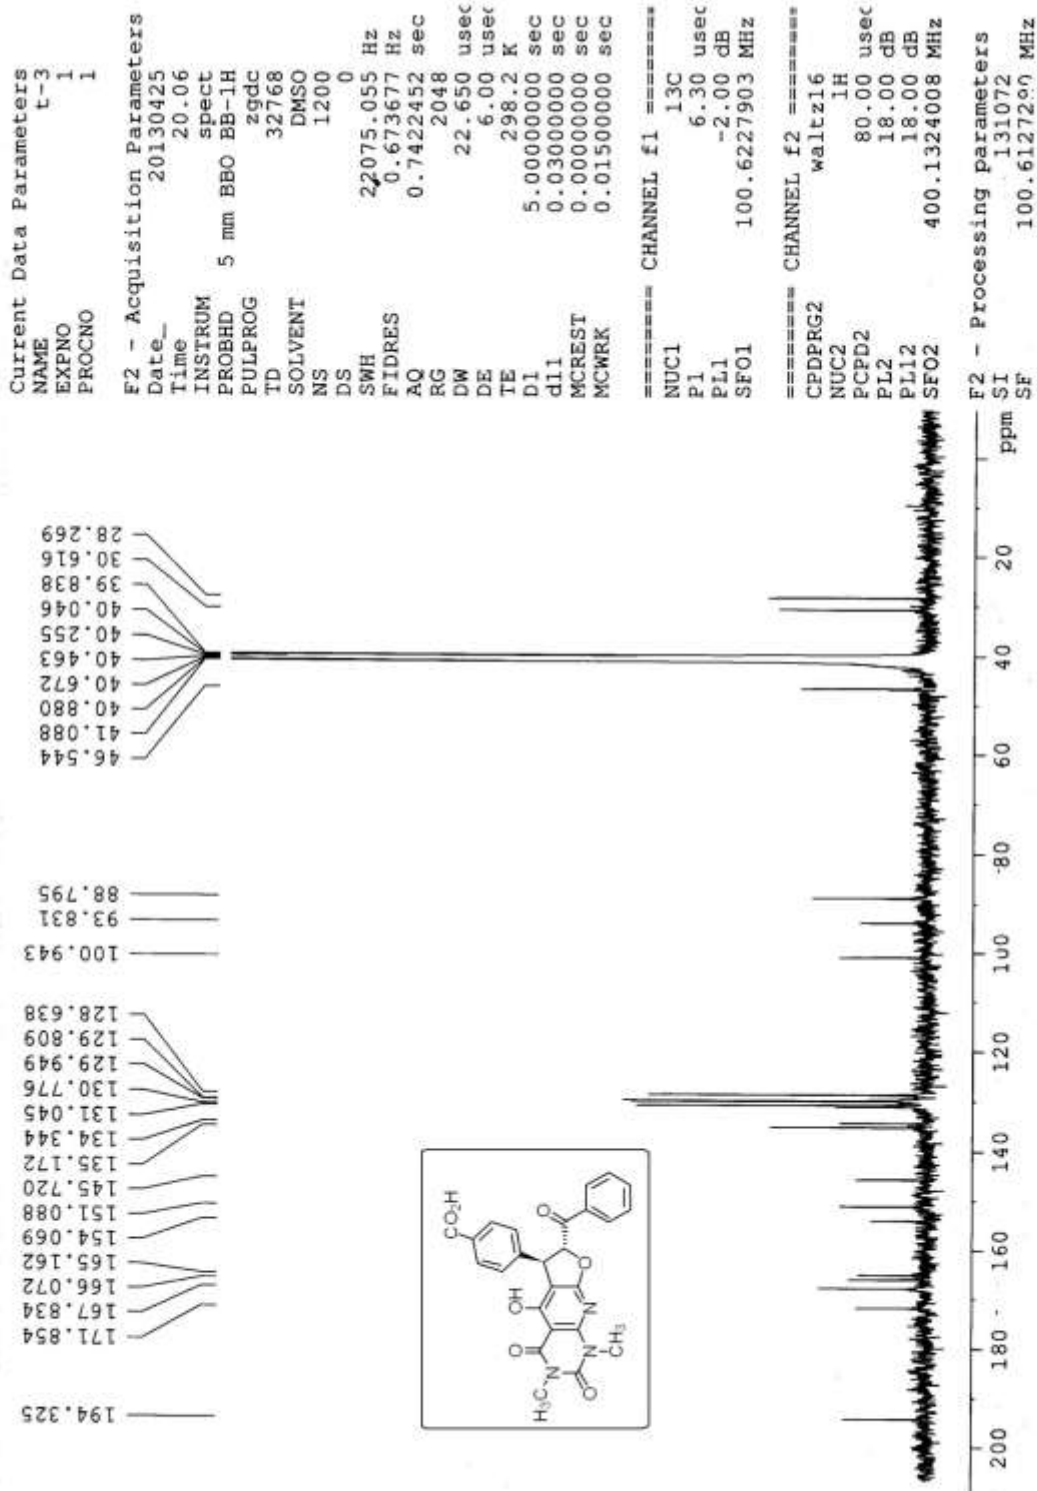



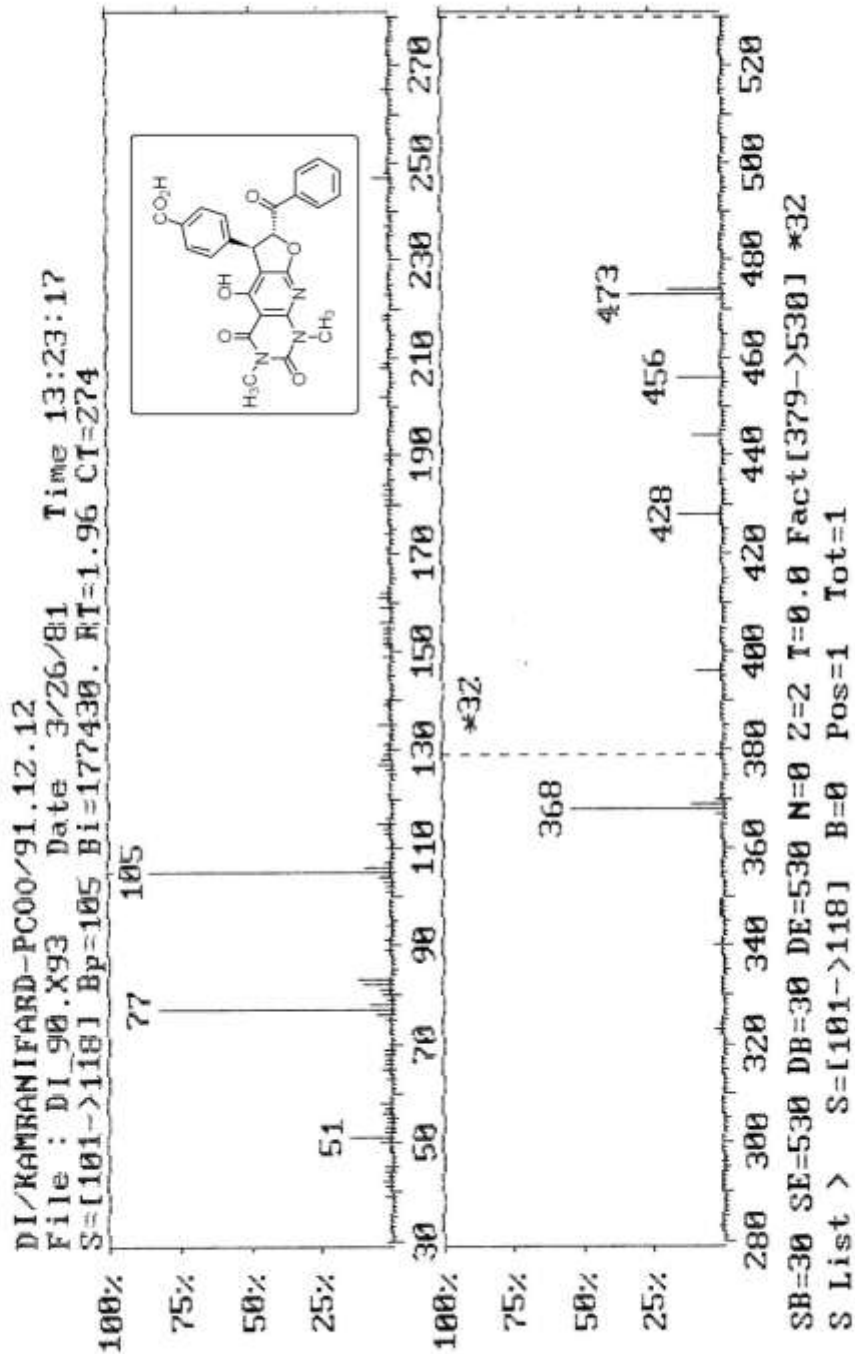

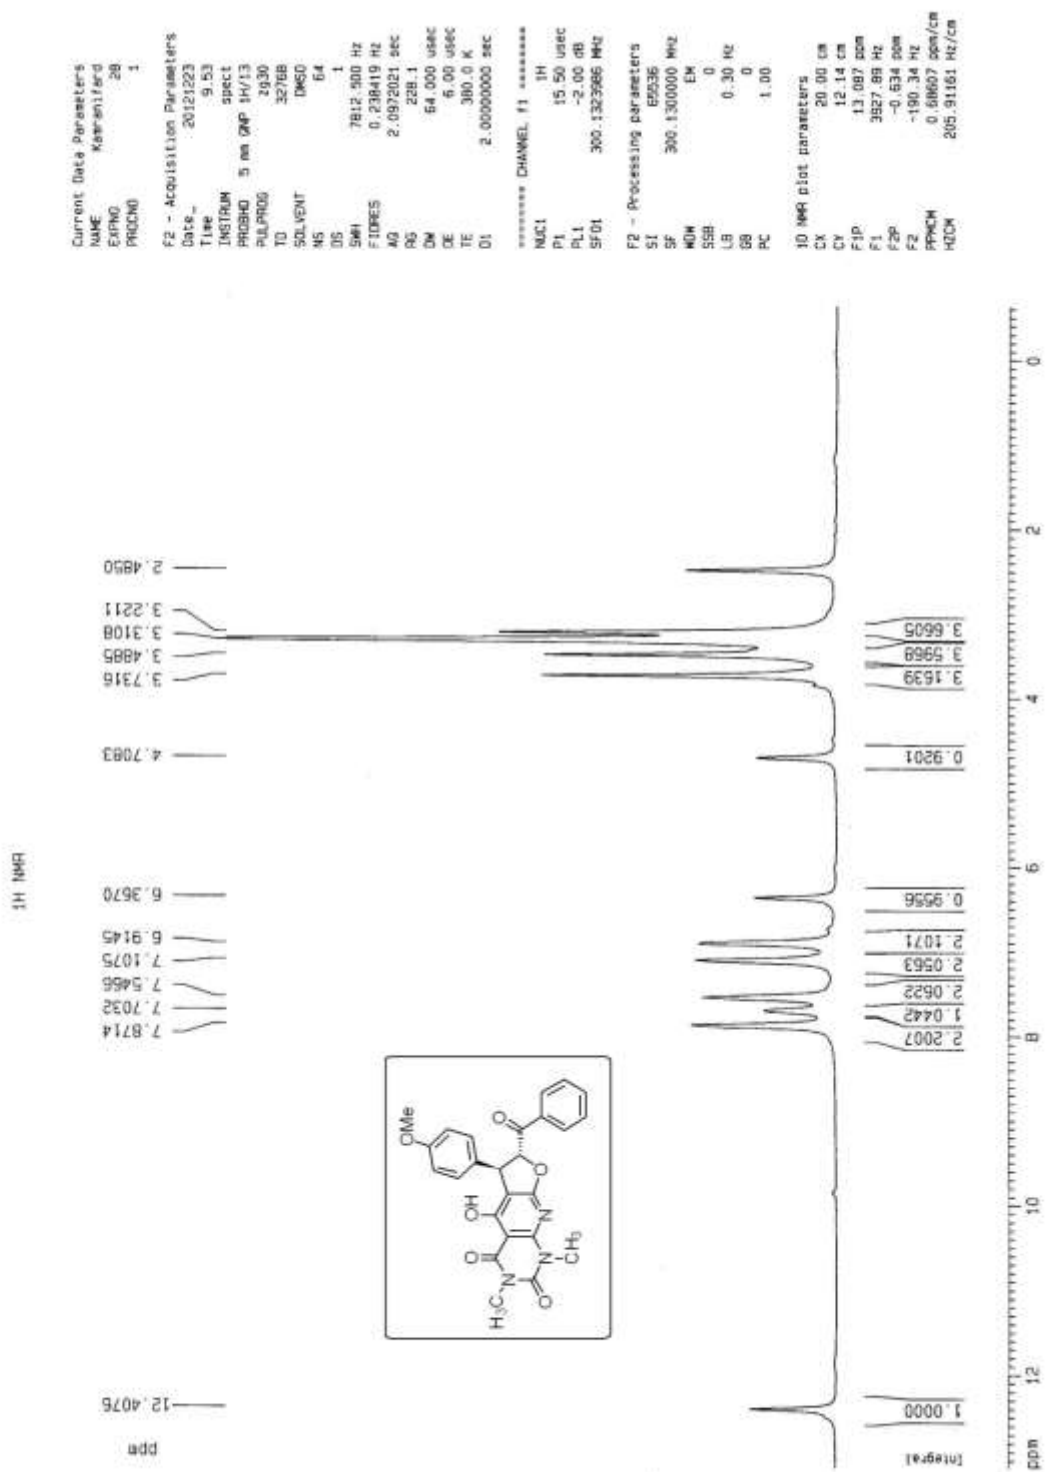

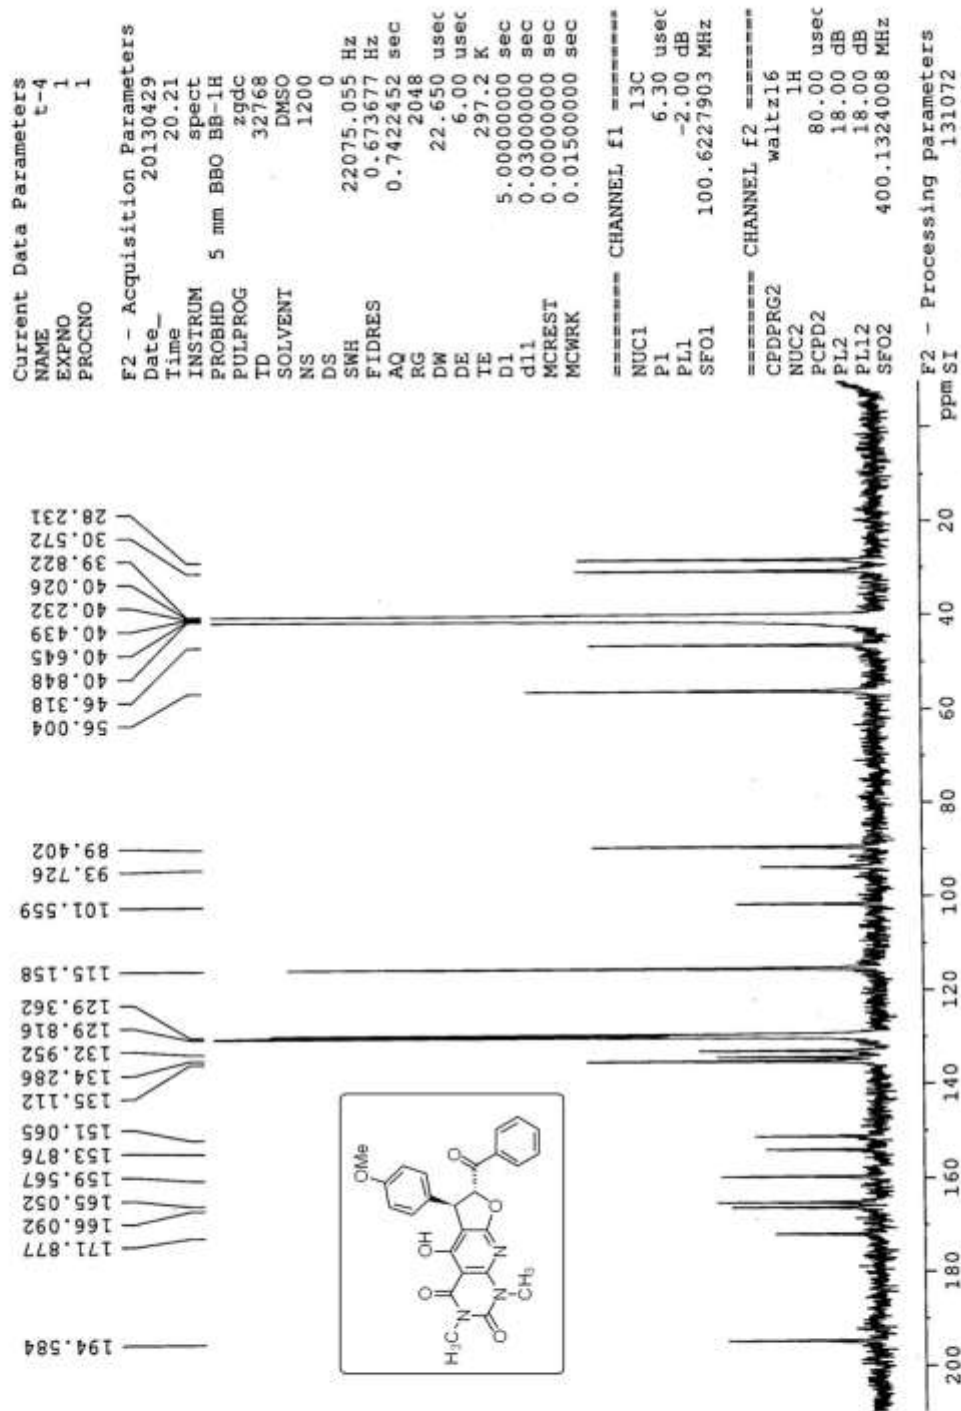

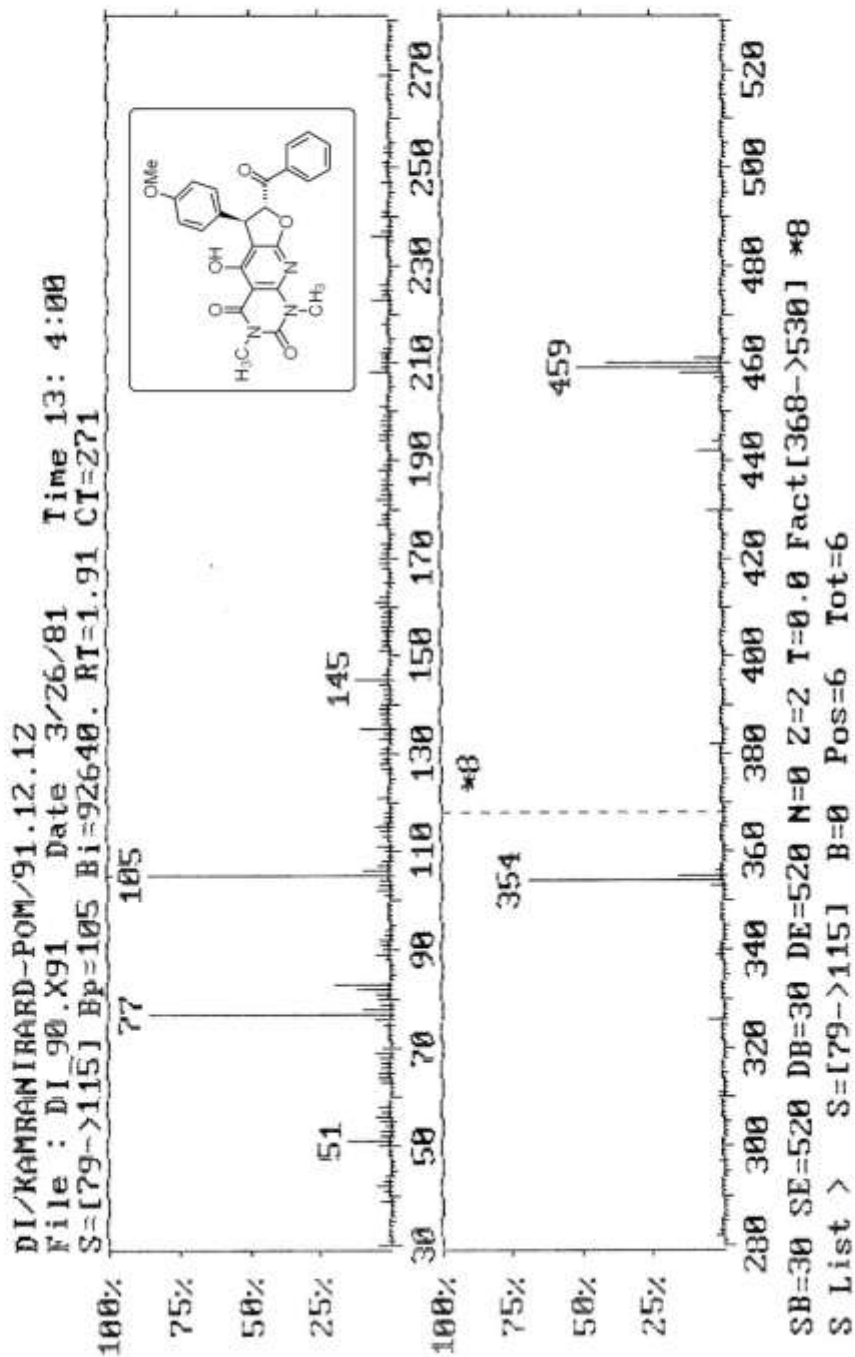

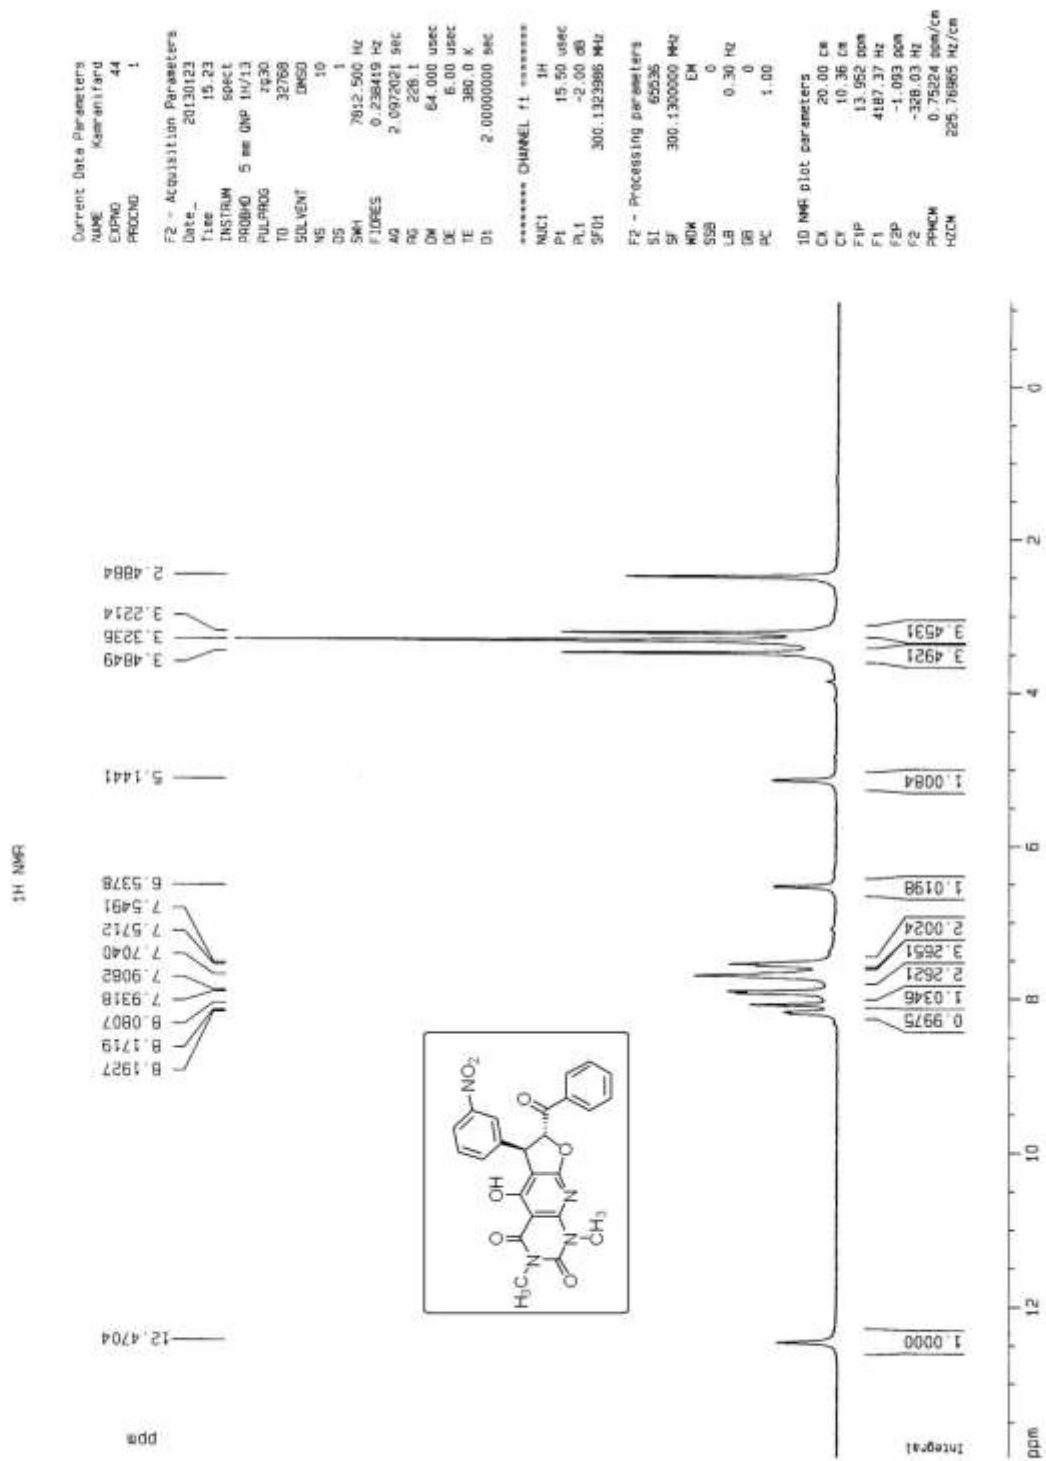

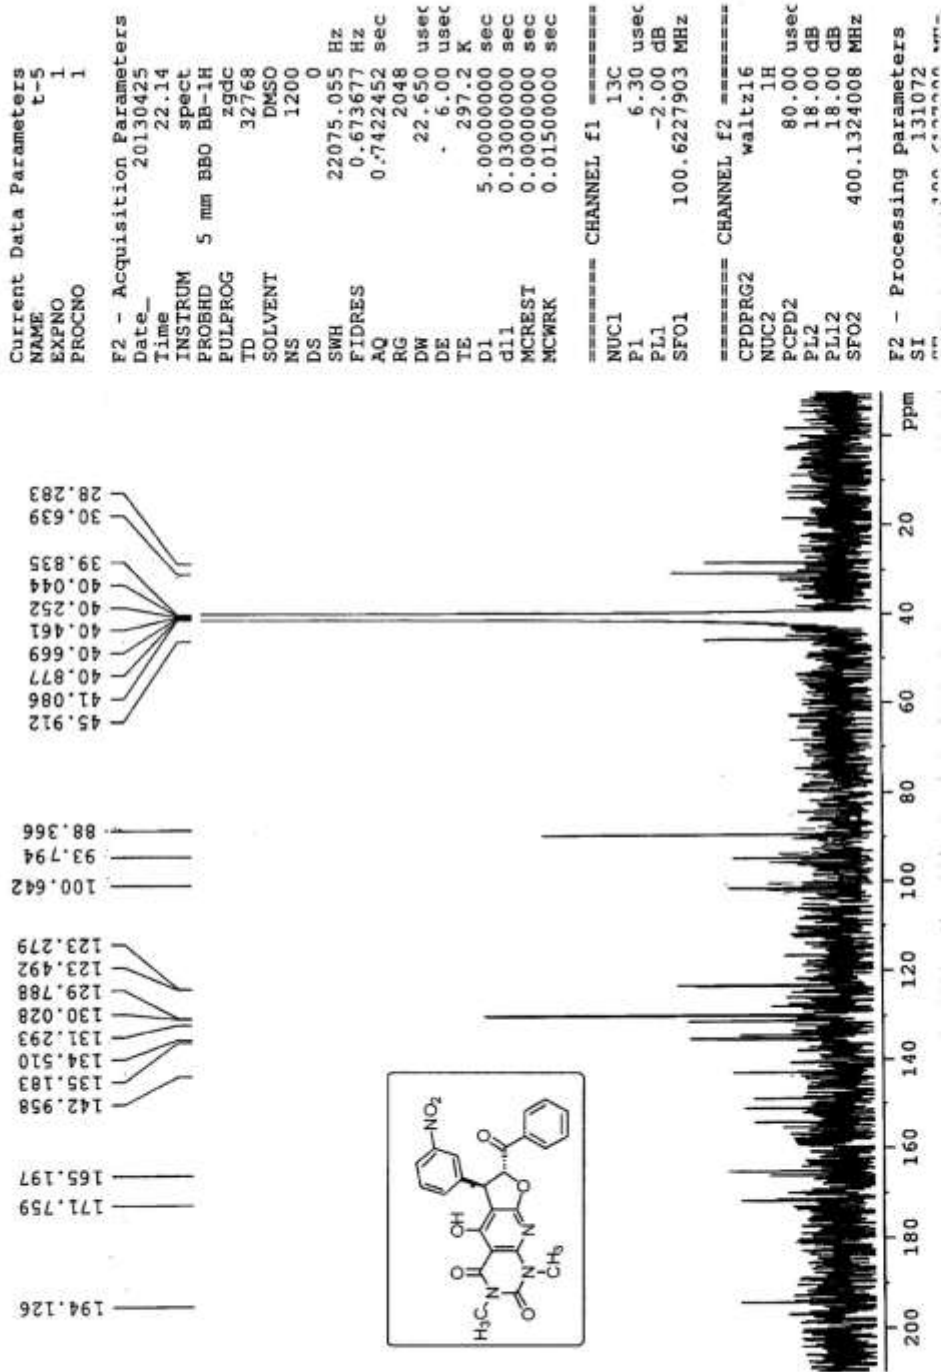

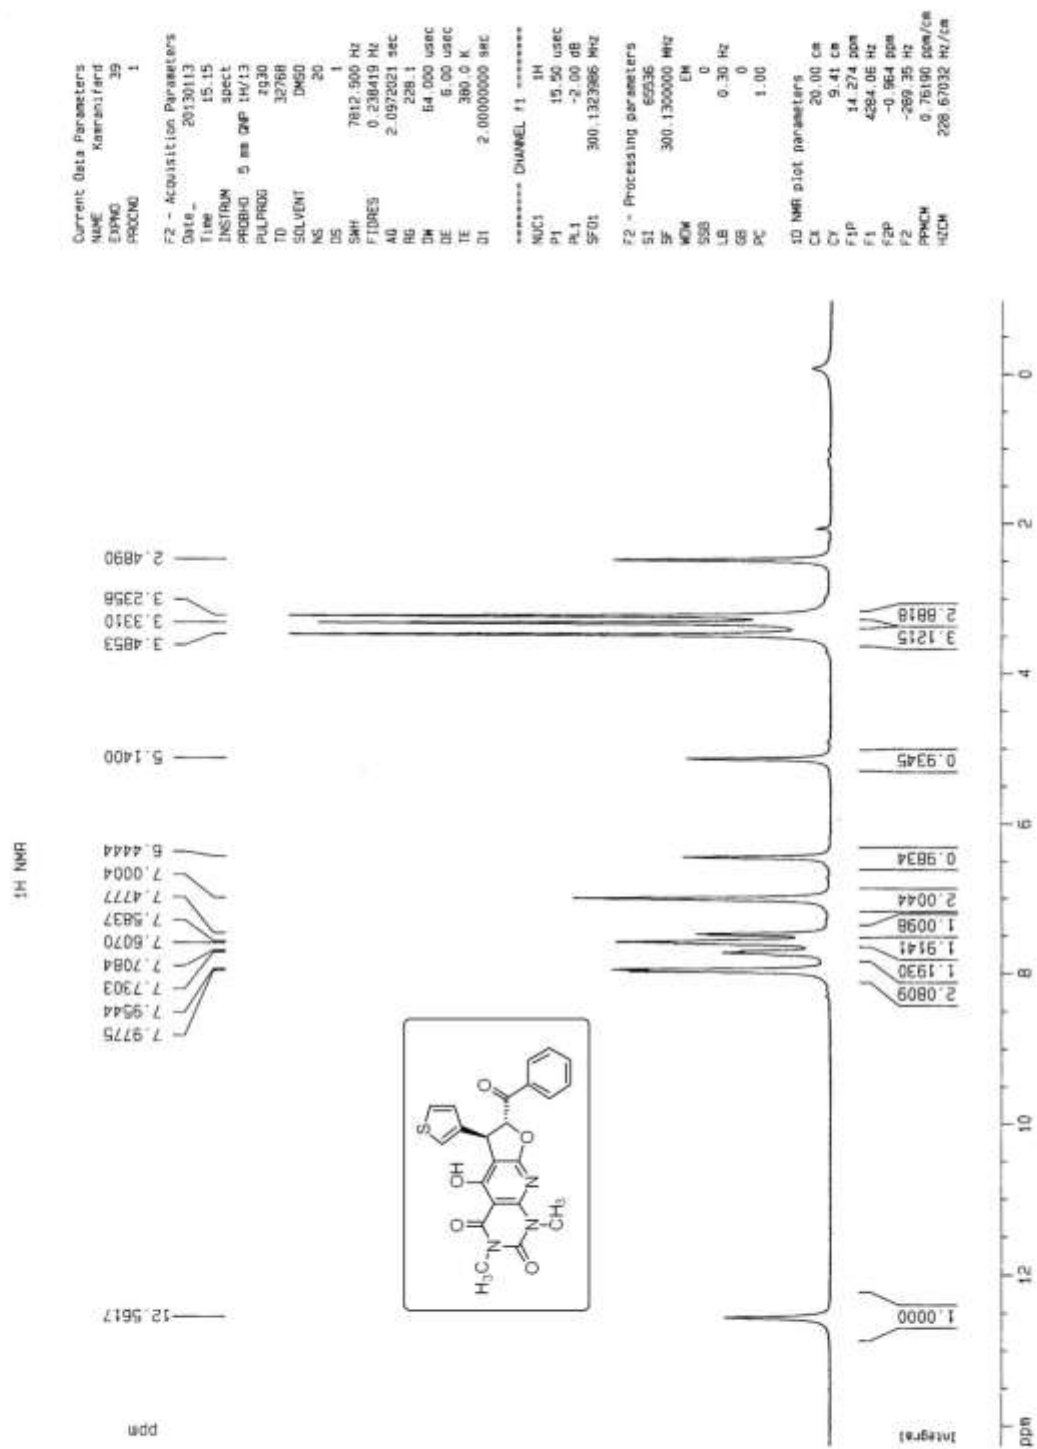

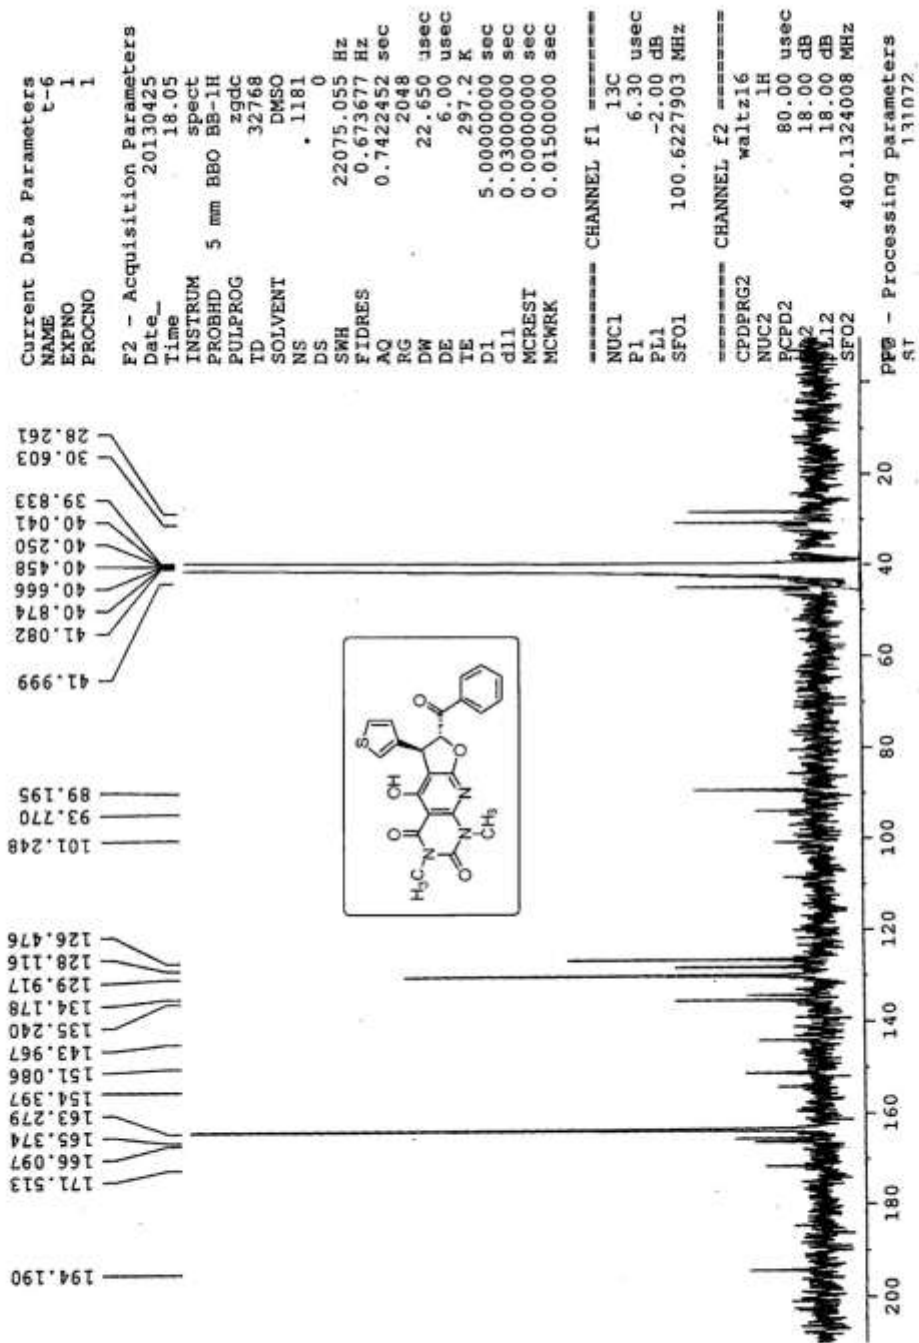



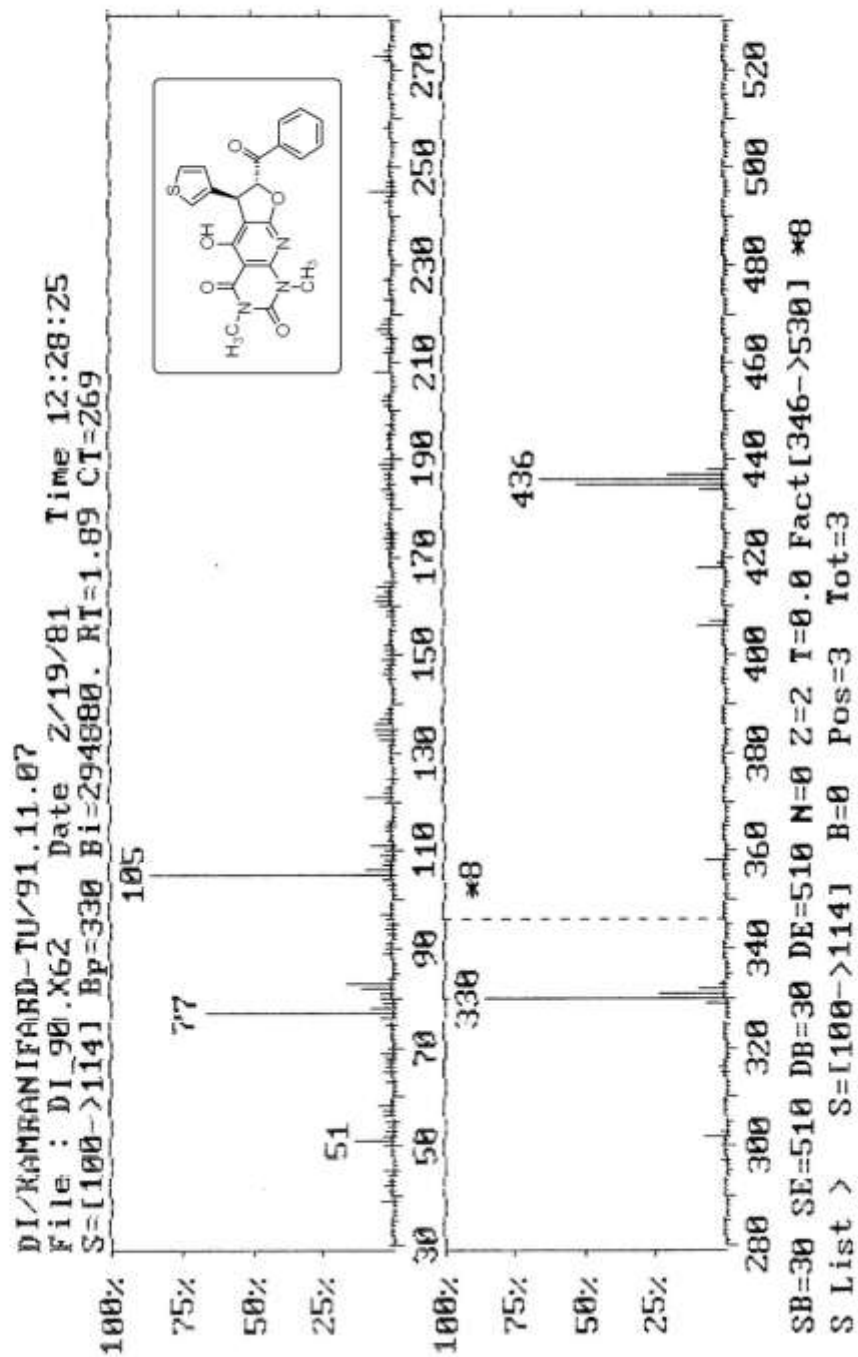

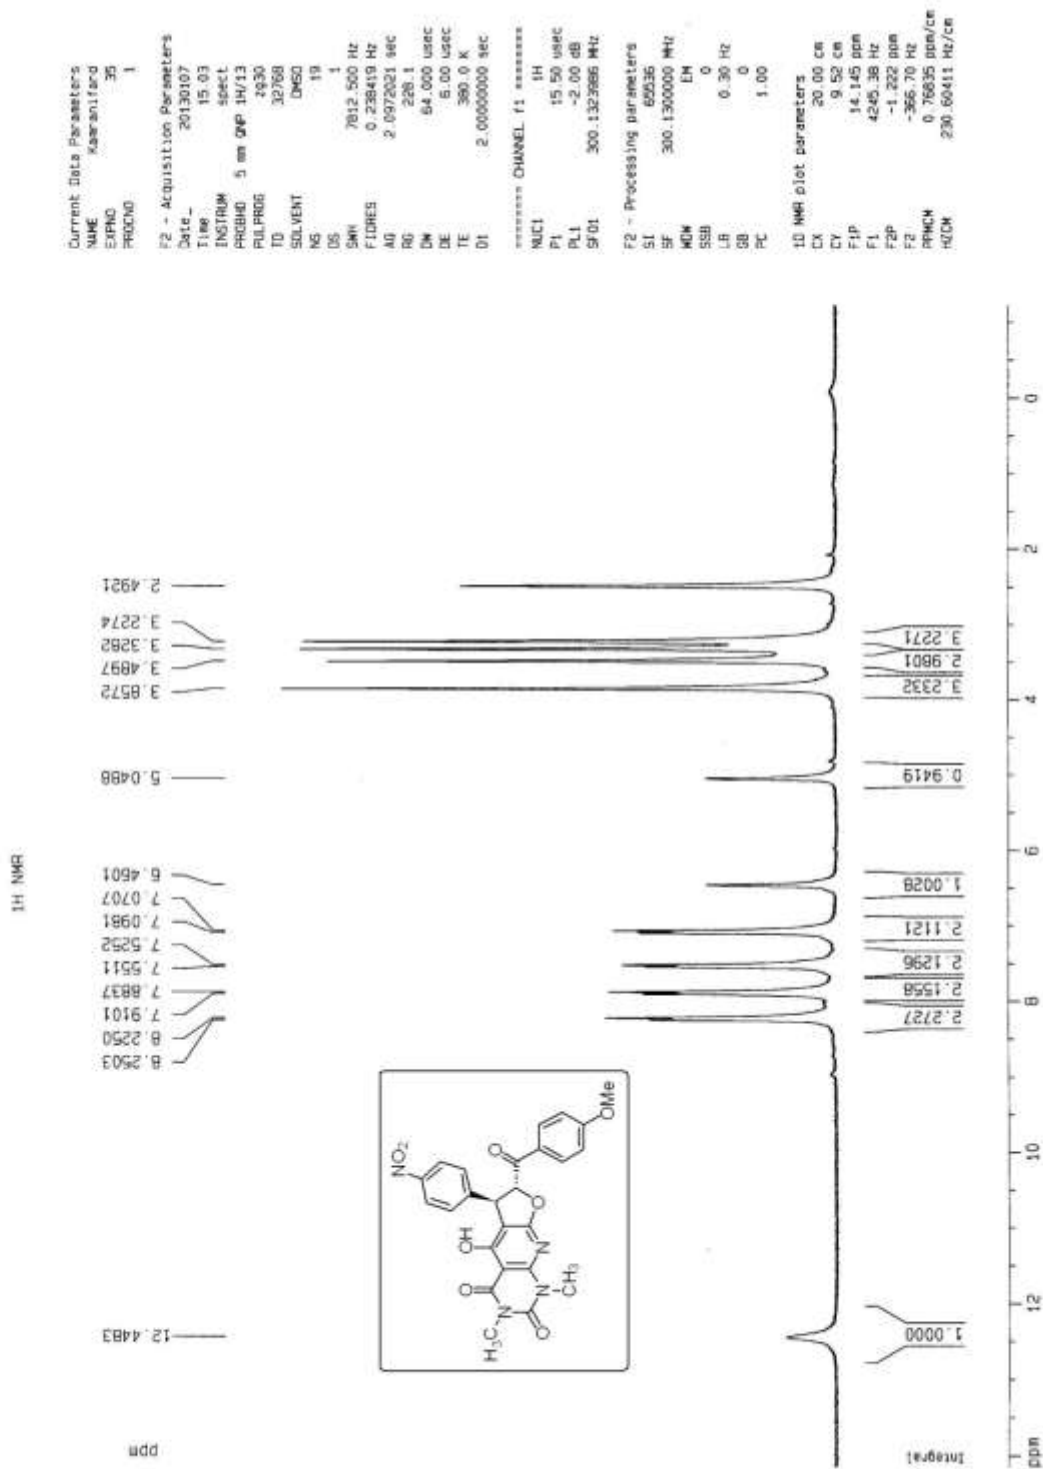

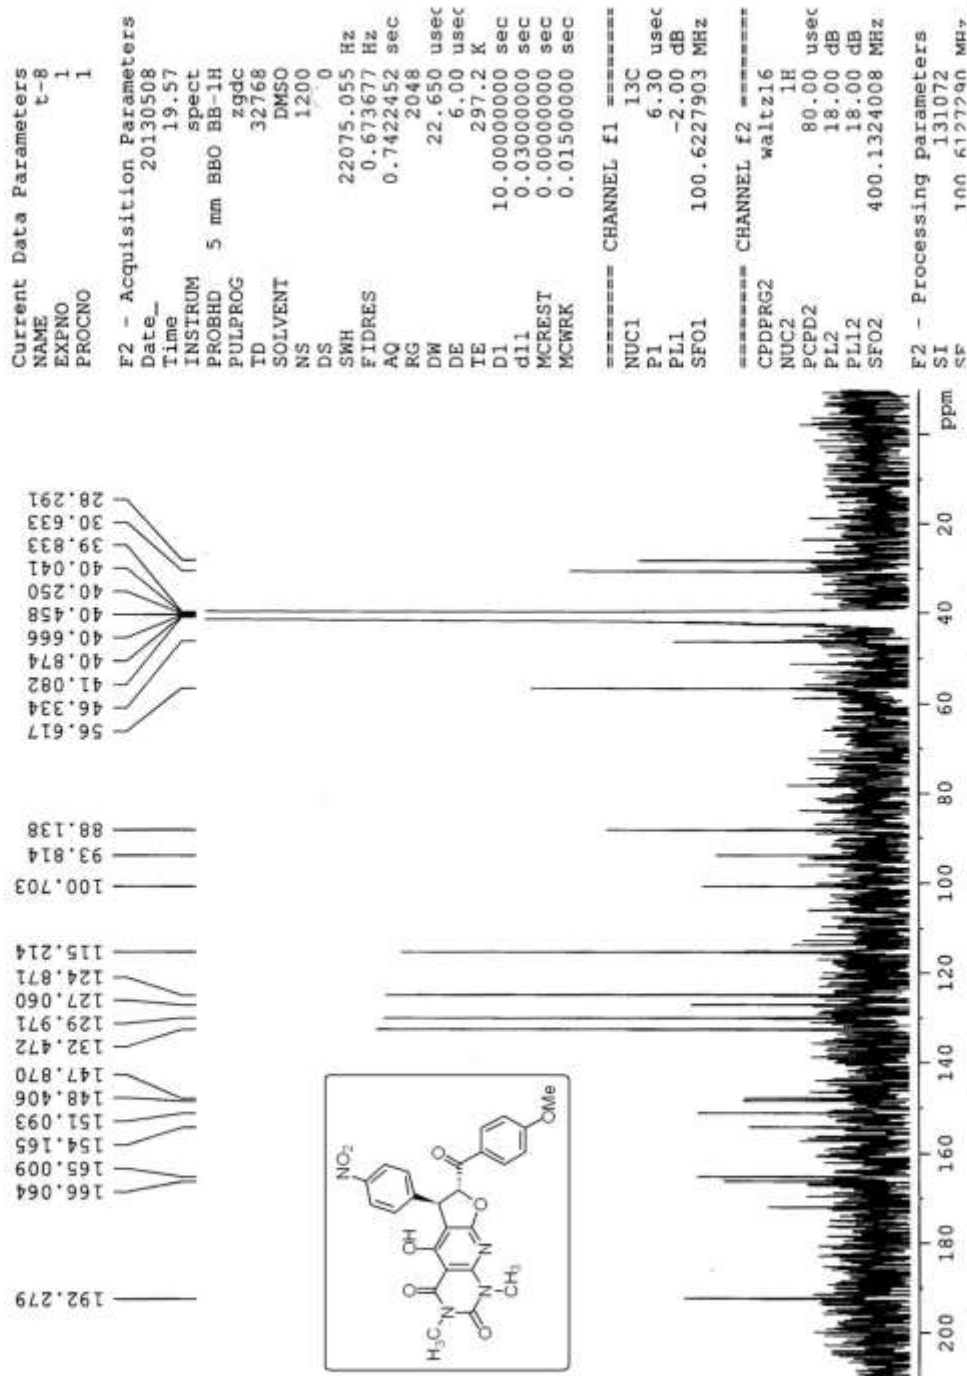

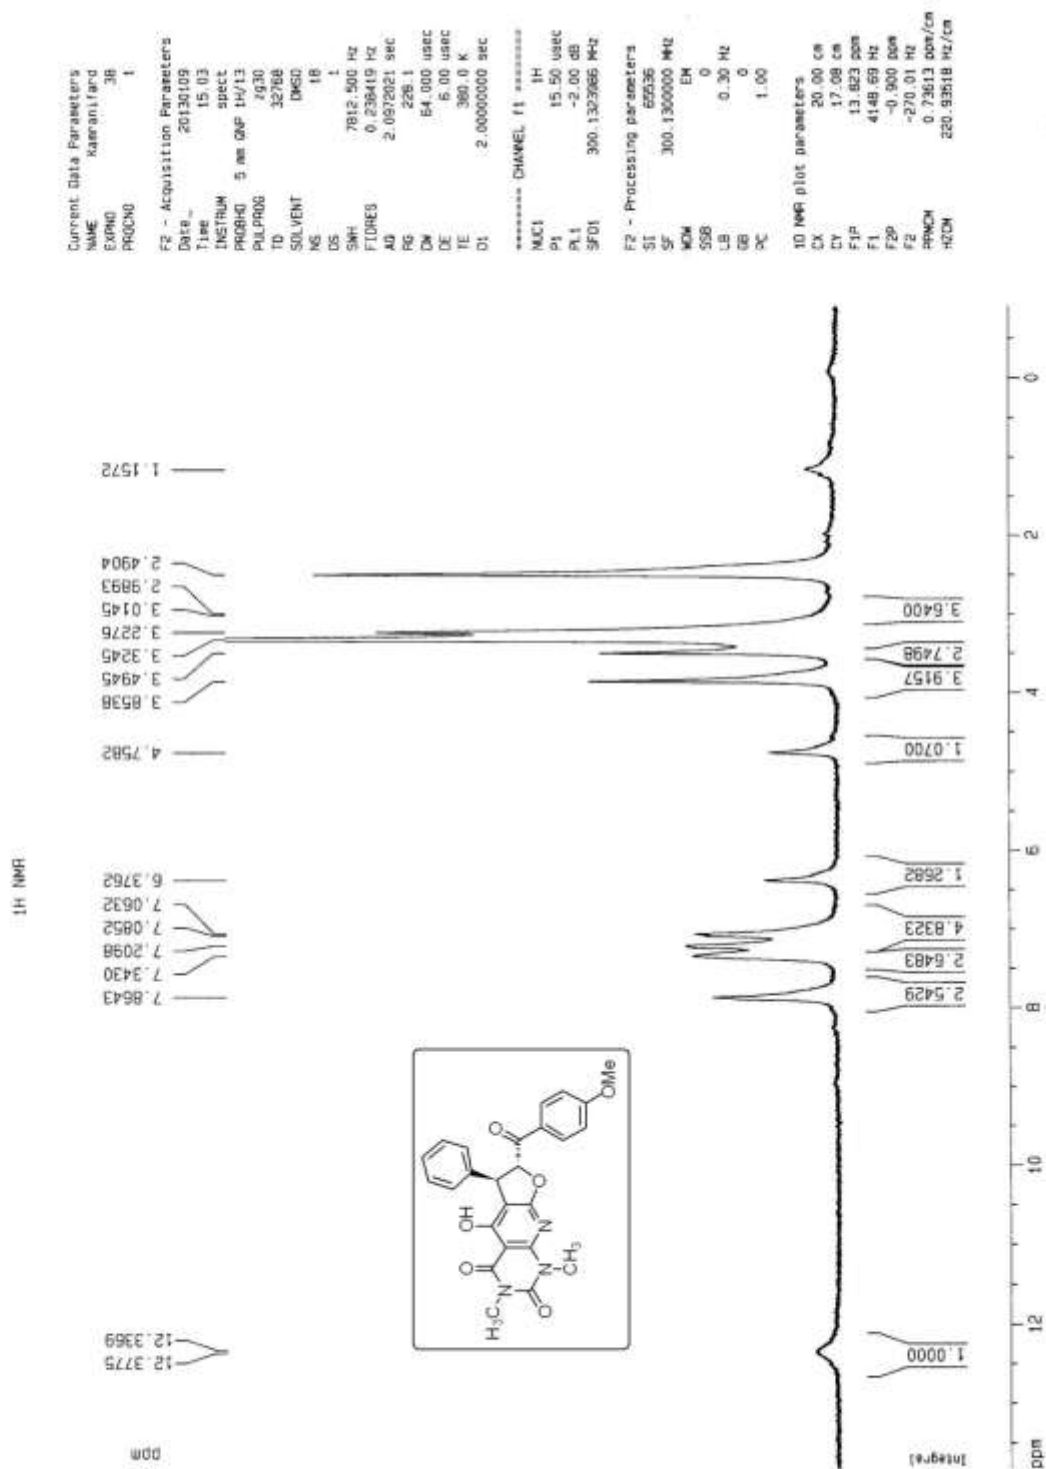

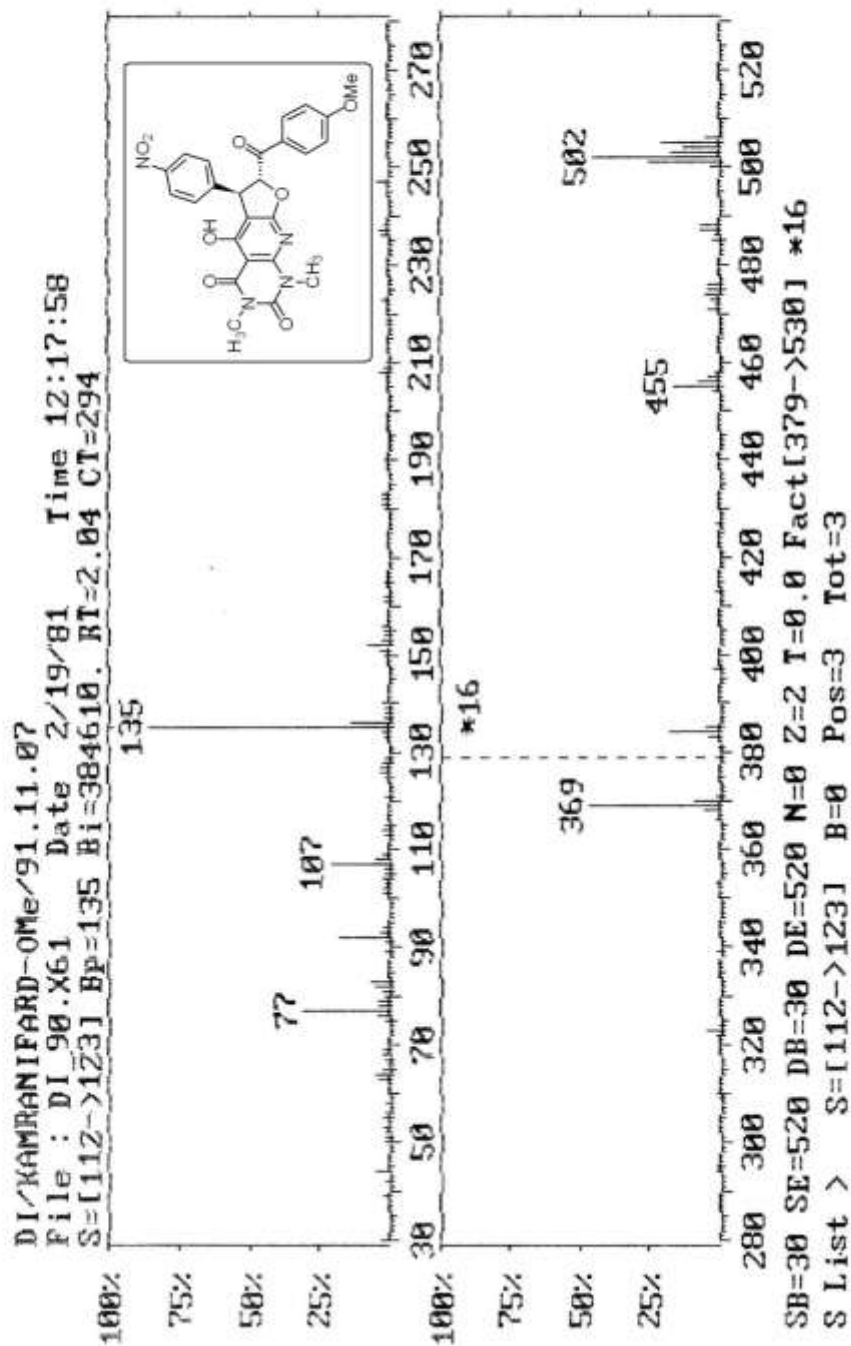

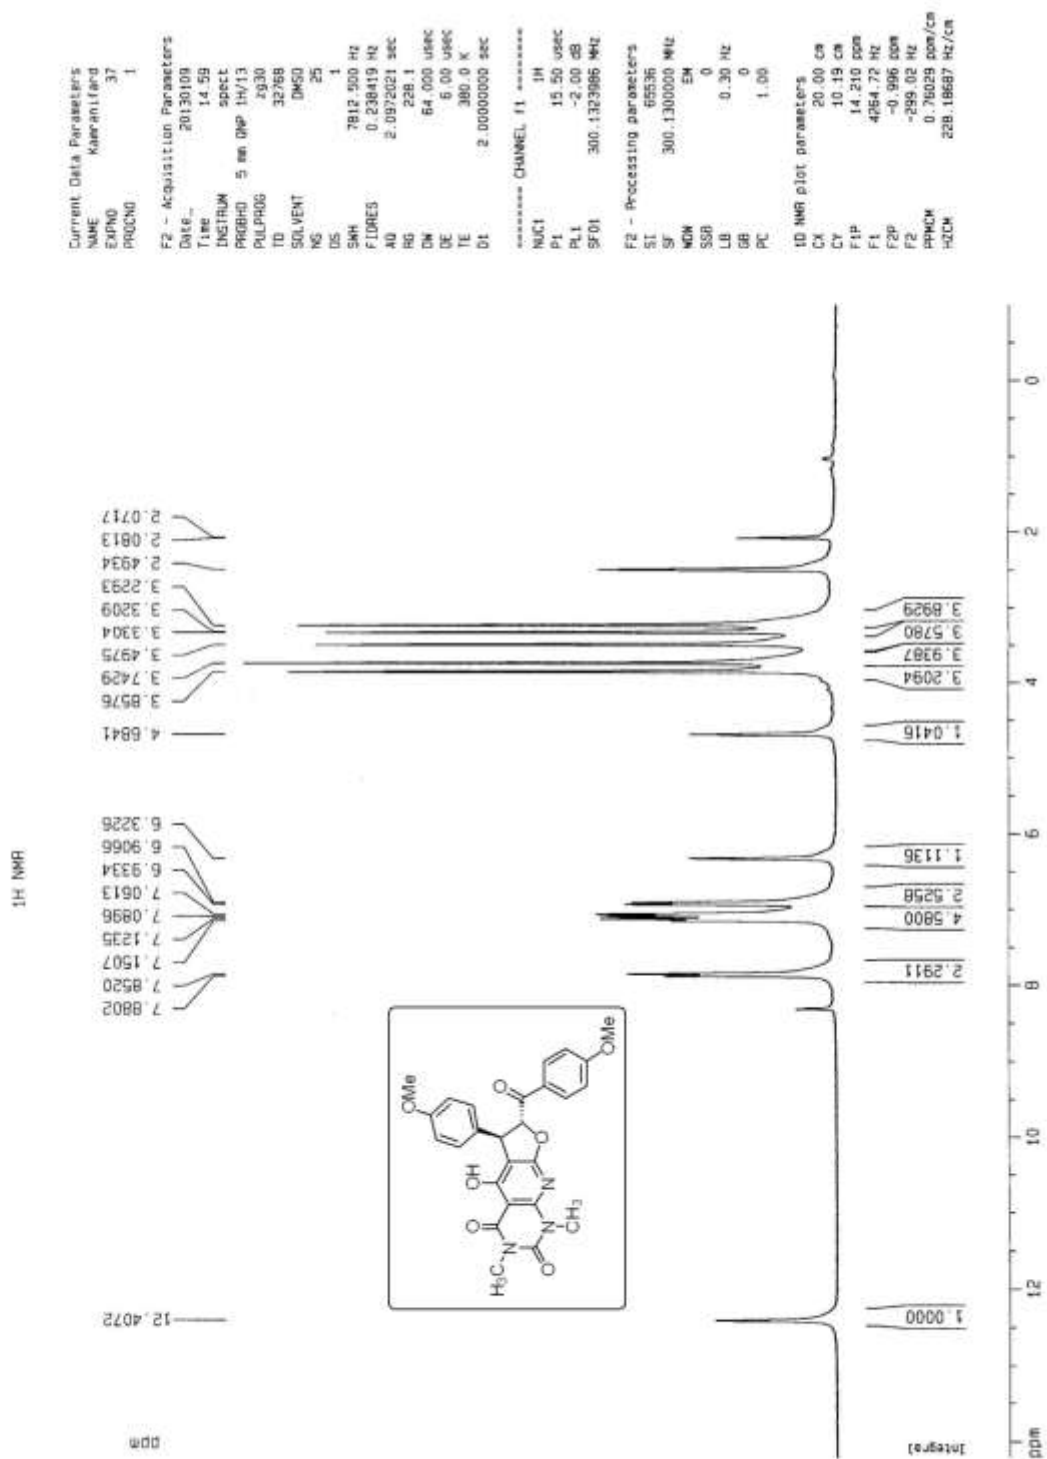

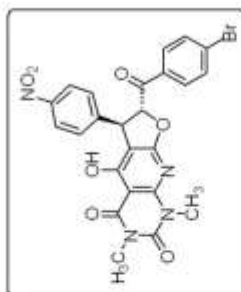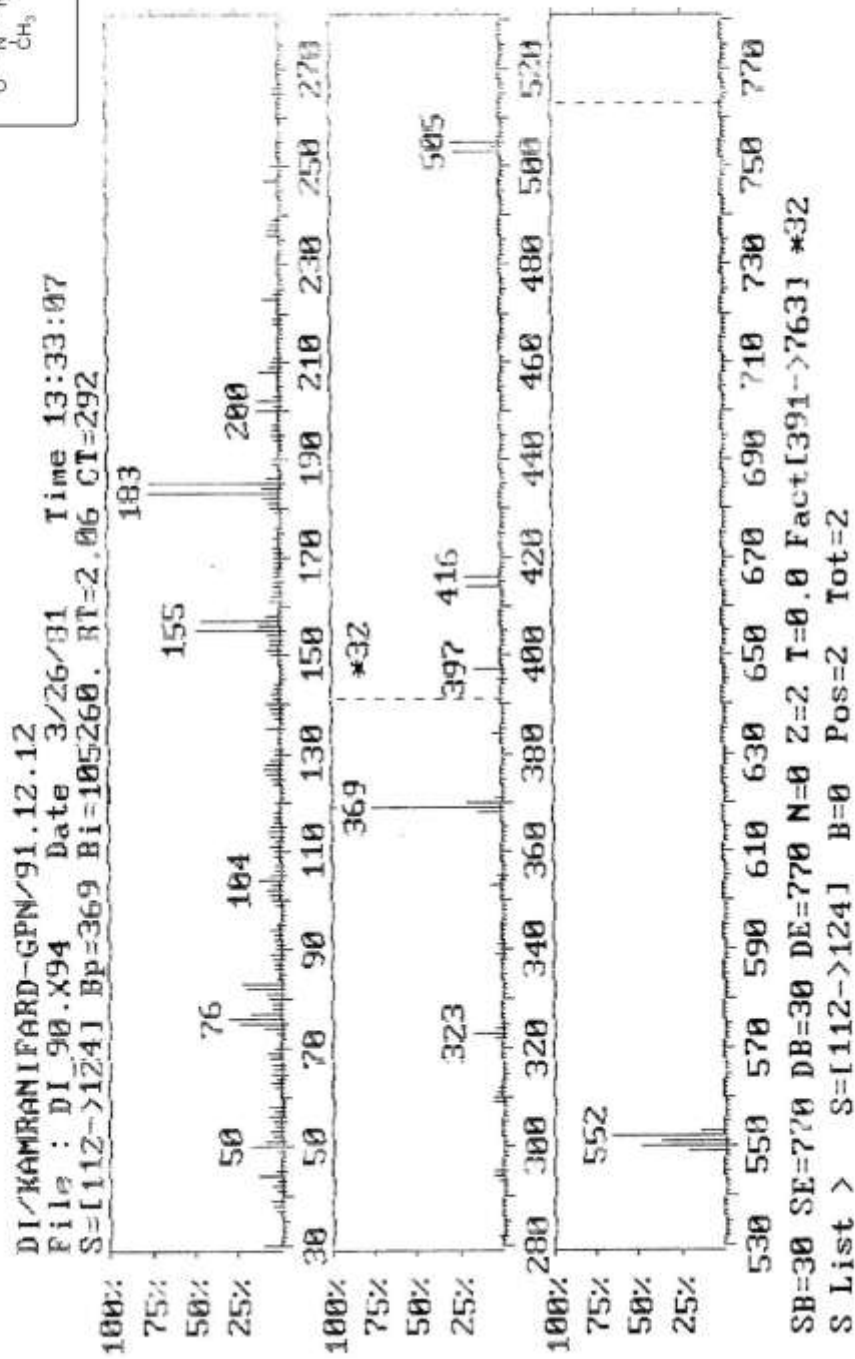

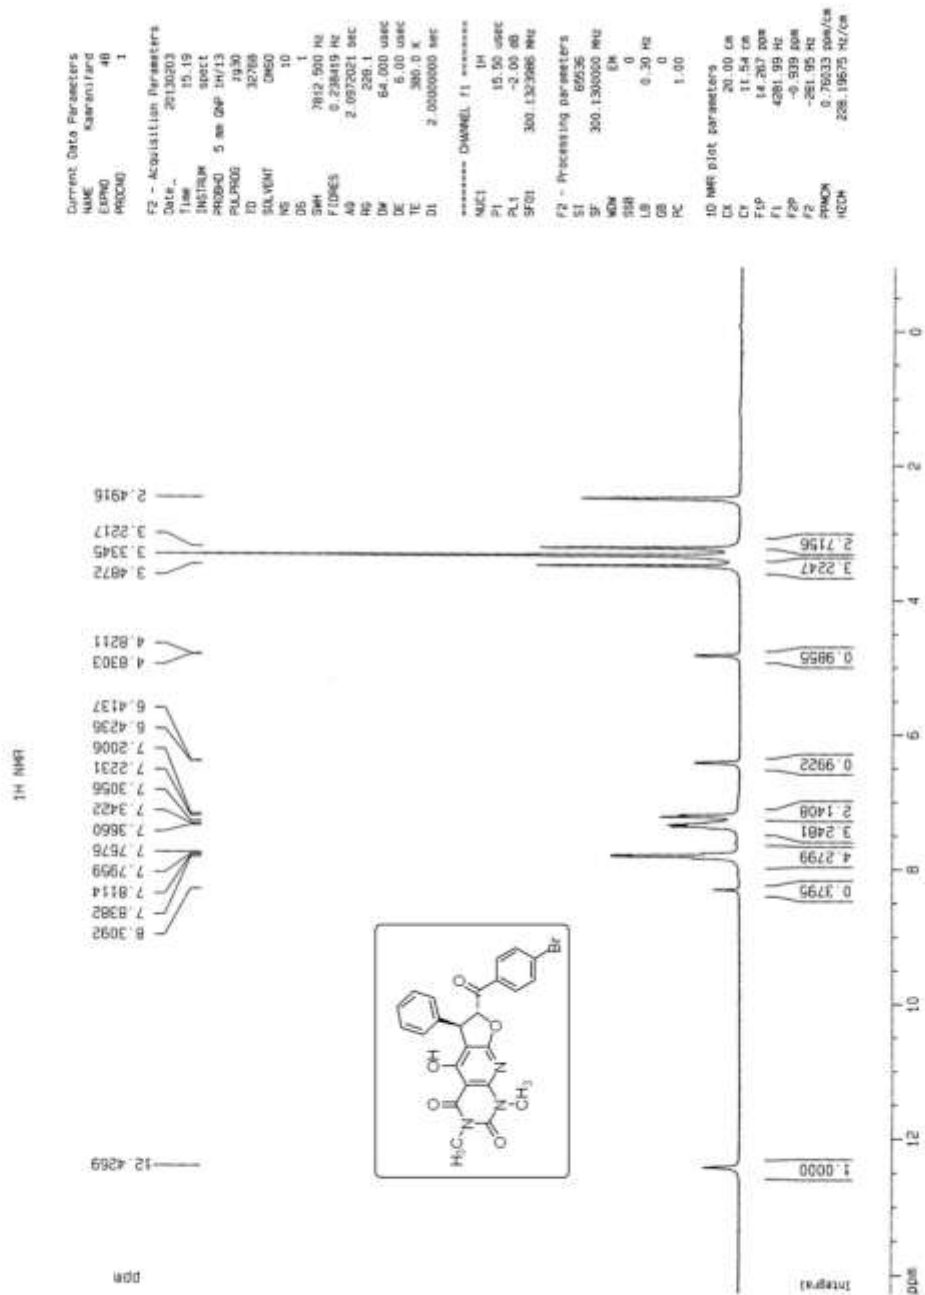



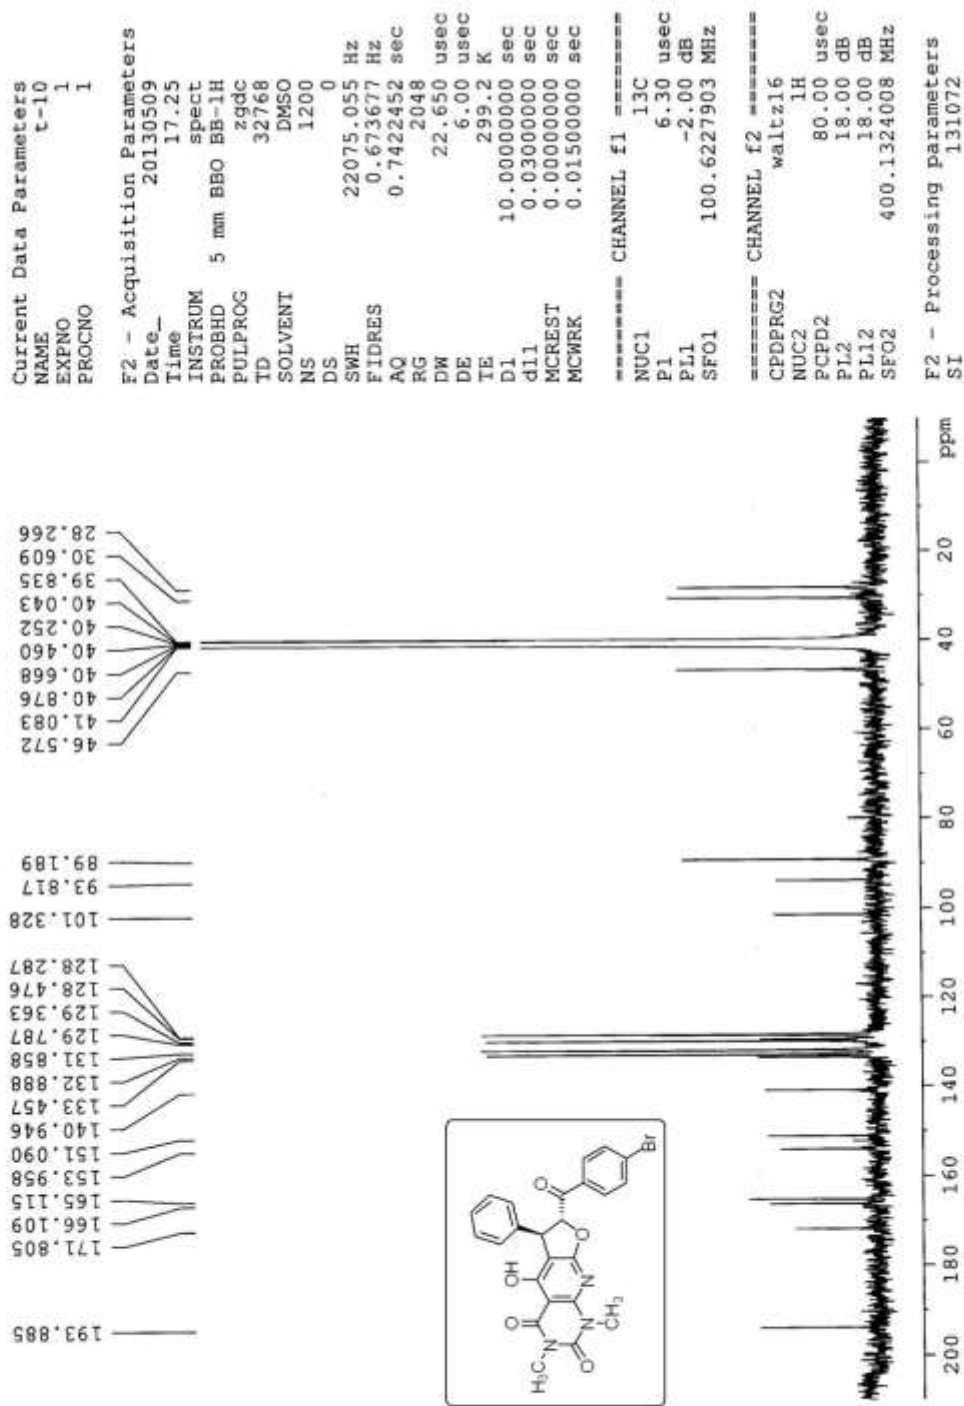

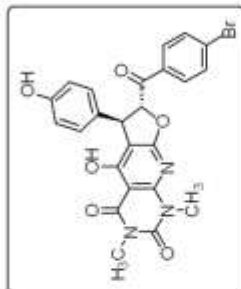

DI/KAMBANIFARD-BPOH/92.01.24  
File : DI\_91.X10 Date 5/ 7/81 Time 11:10:21  
S=[1104->114] Bp=340 Bi=59300. RT=1.89 CI=261

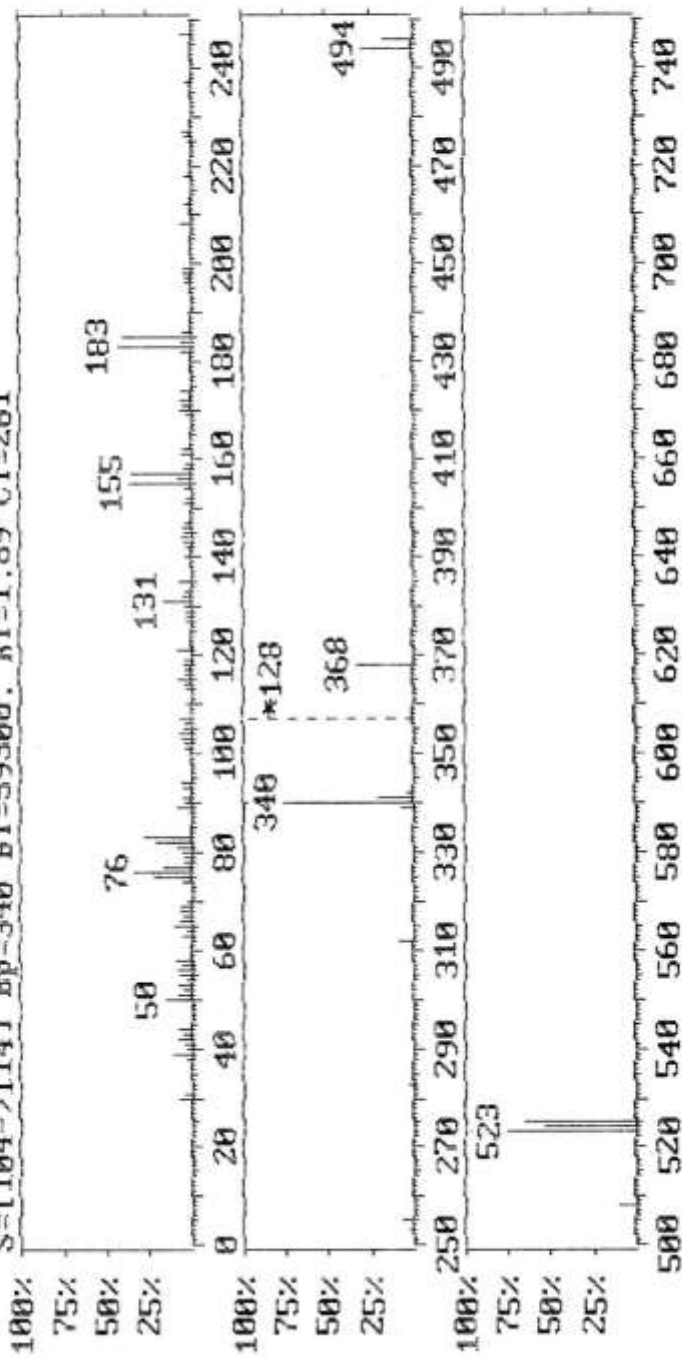

SB=30 SE=720 DB=0 DE=720 N=0 Z=2 I=0.0 Fact[357->778]\*128  
S List > S=[1104->114] B=0 Pos=1 Tot=1

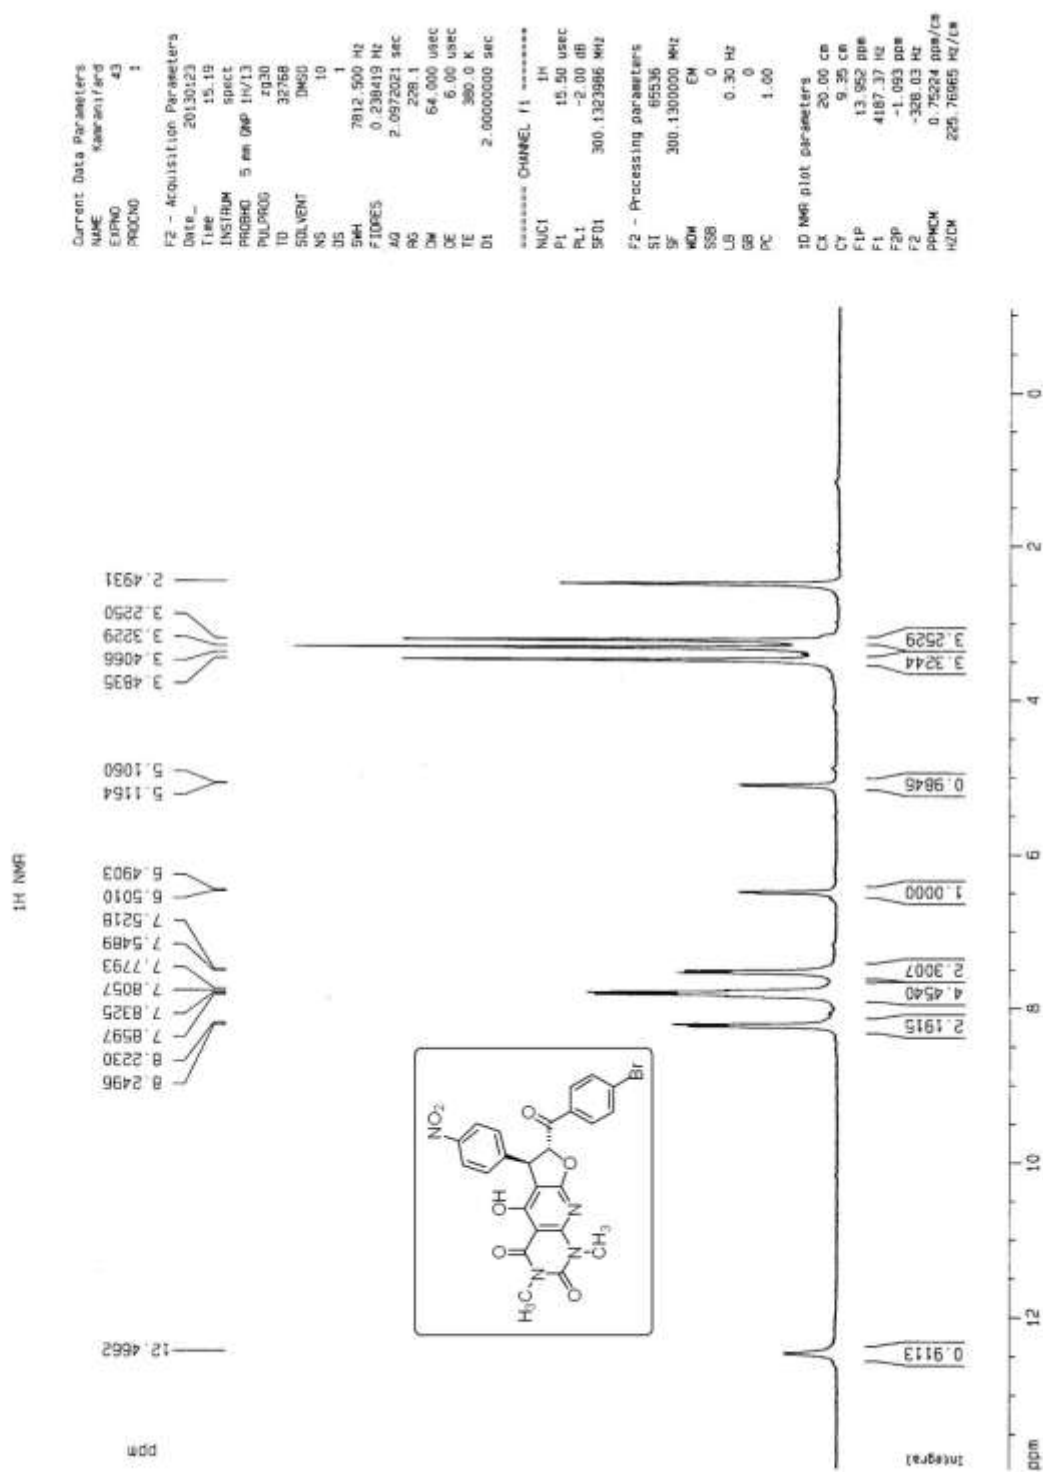

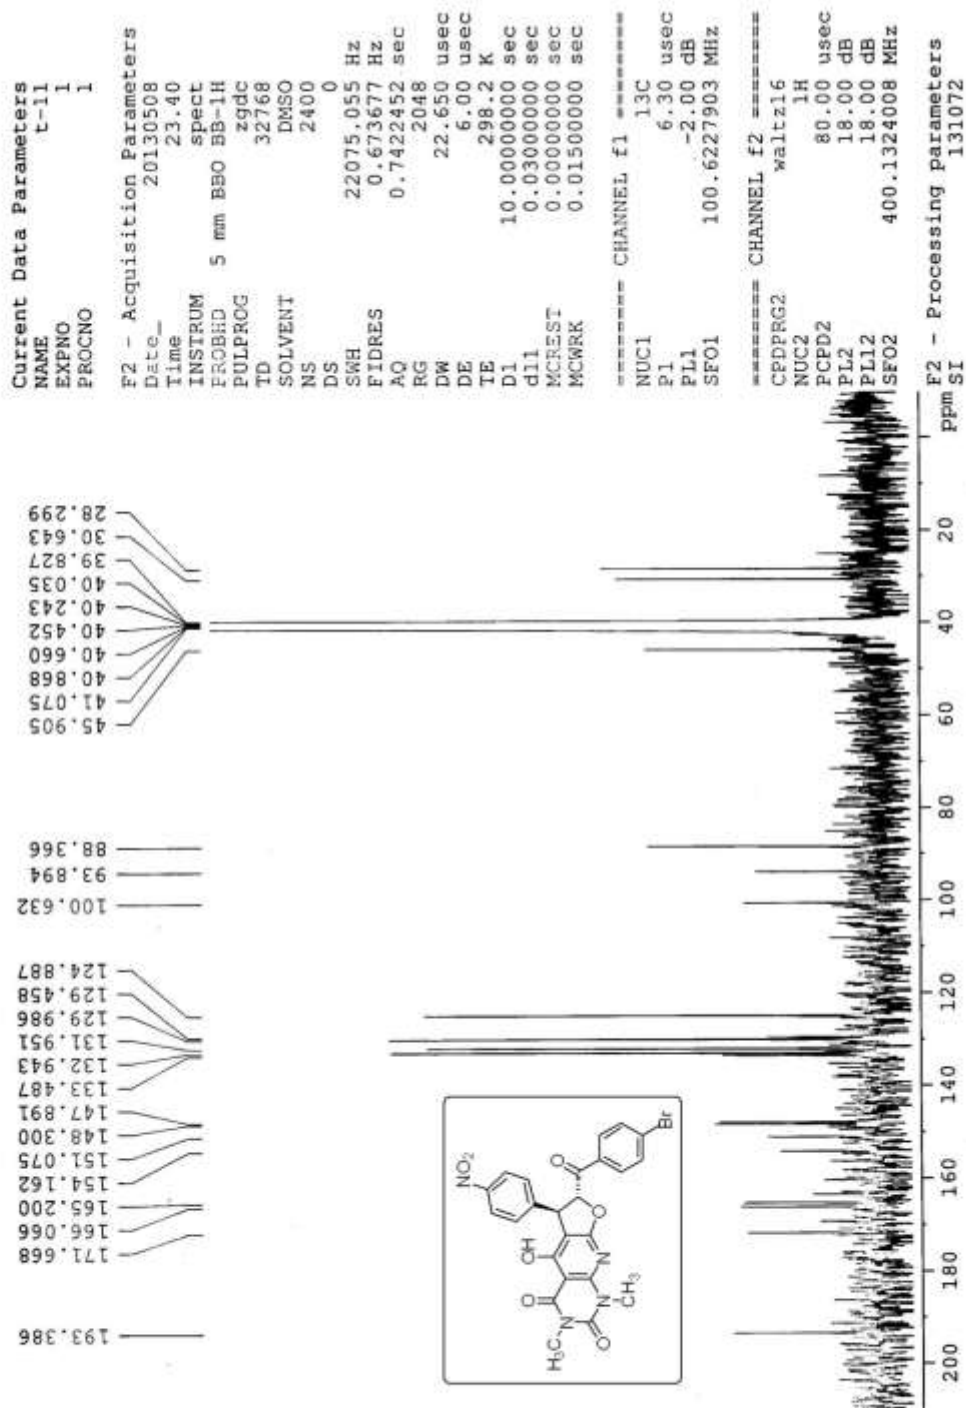

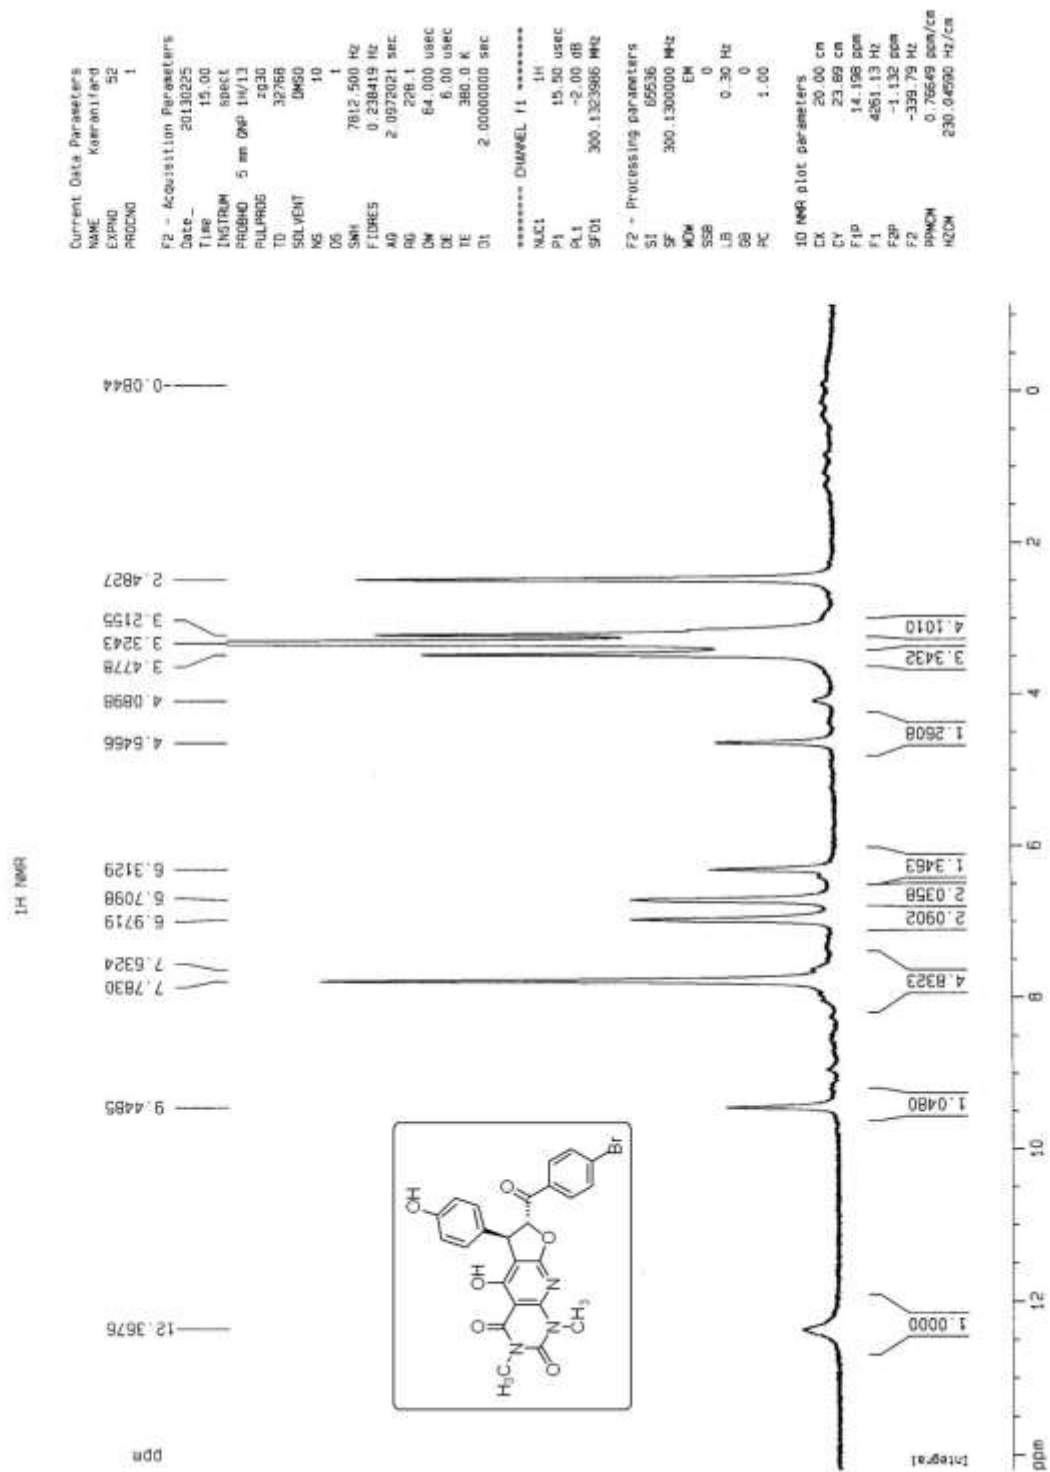

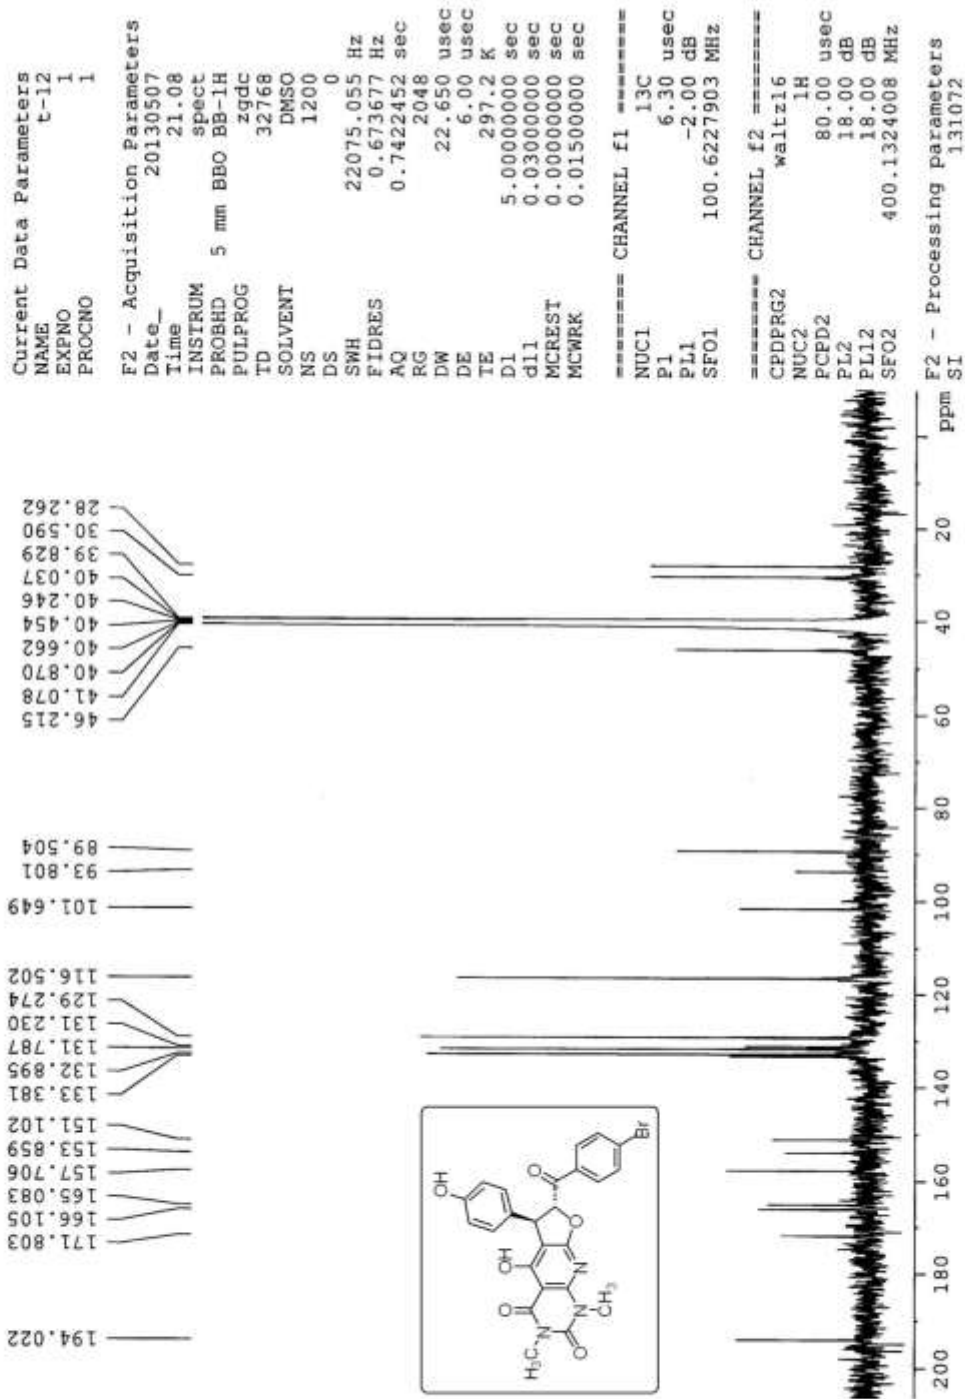

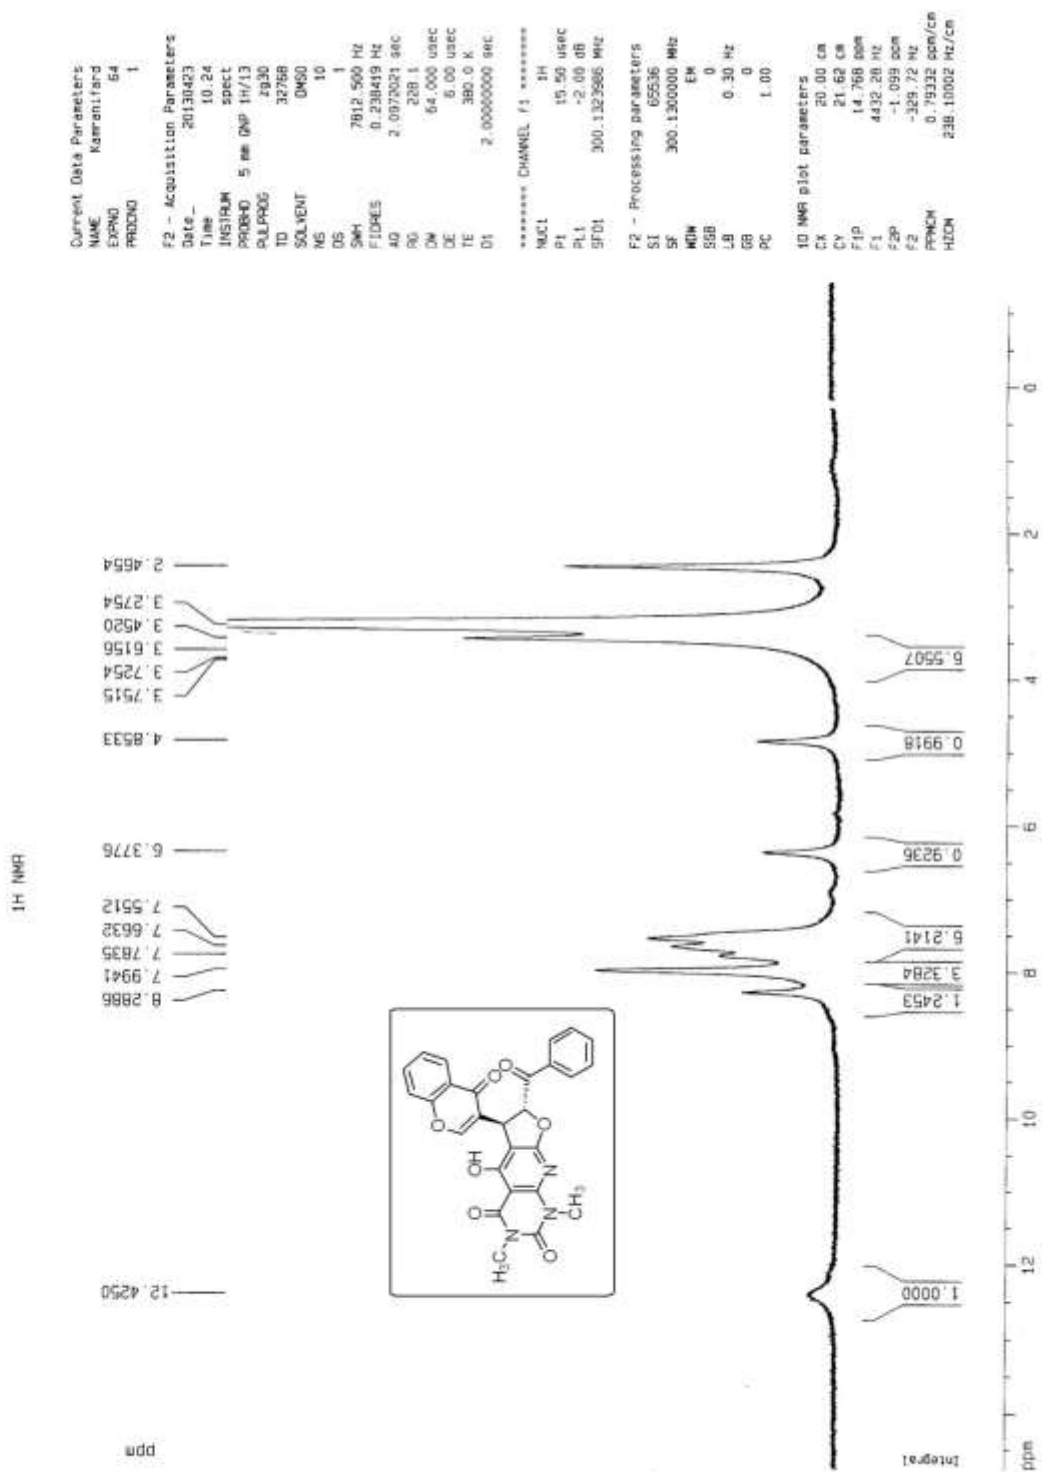

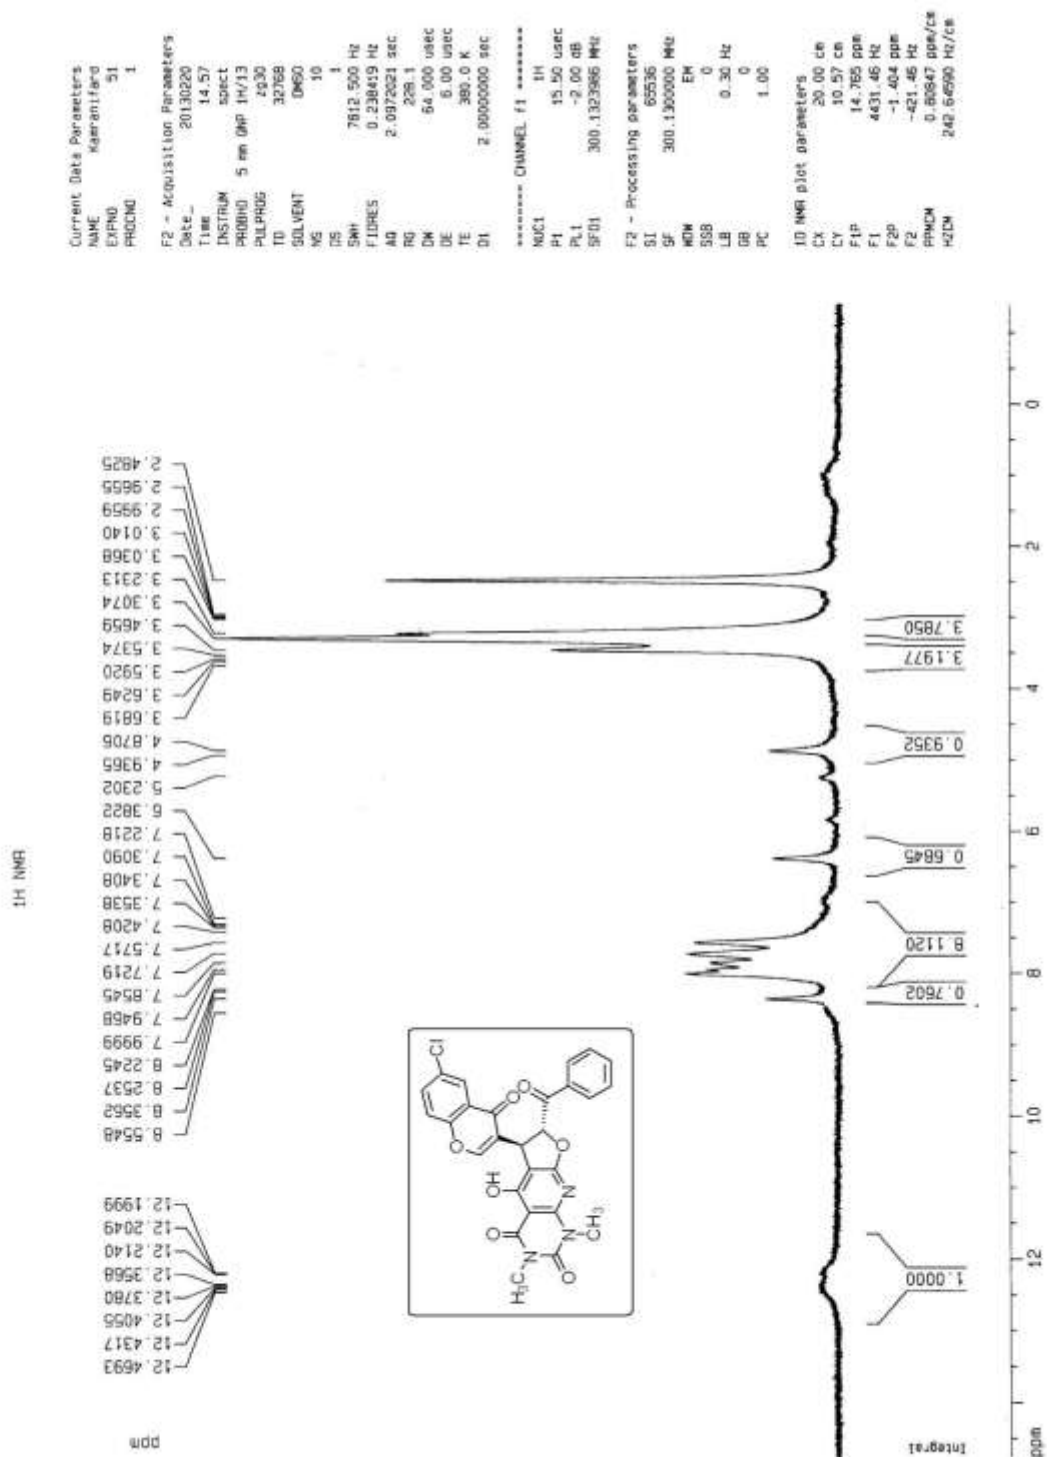



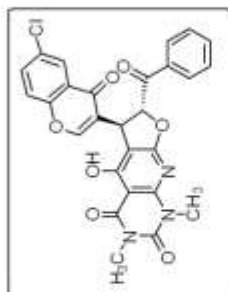

DI/KAMRANIFARD-PCL/92.01.24  
File : DI\_91.X11 Date 5/ 7/81 Time 11:19:52  
S=[97->114] Bp=77 Bi=90870. RT=1.89 CT=278

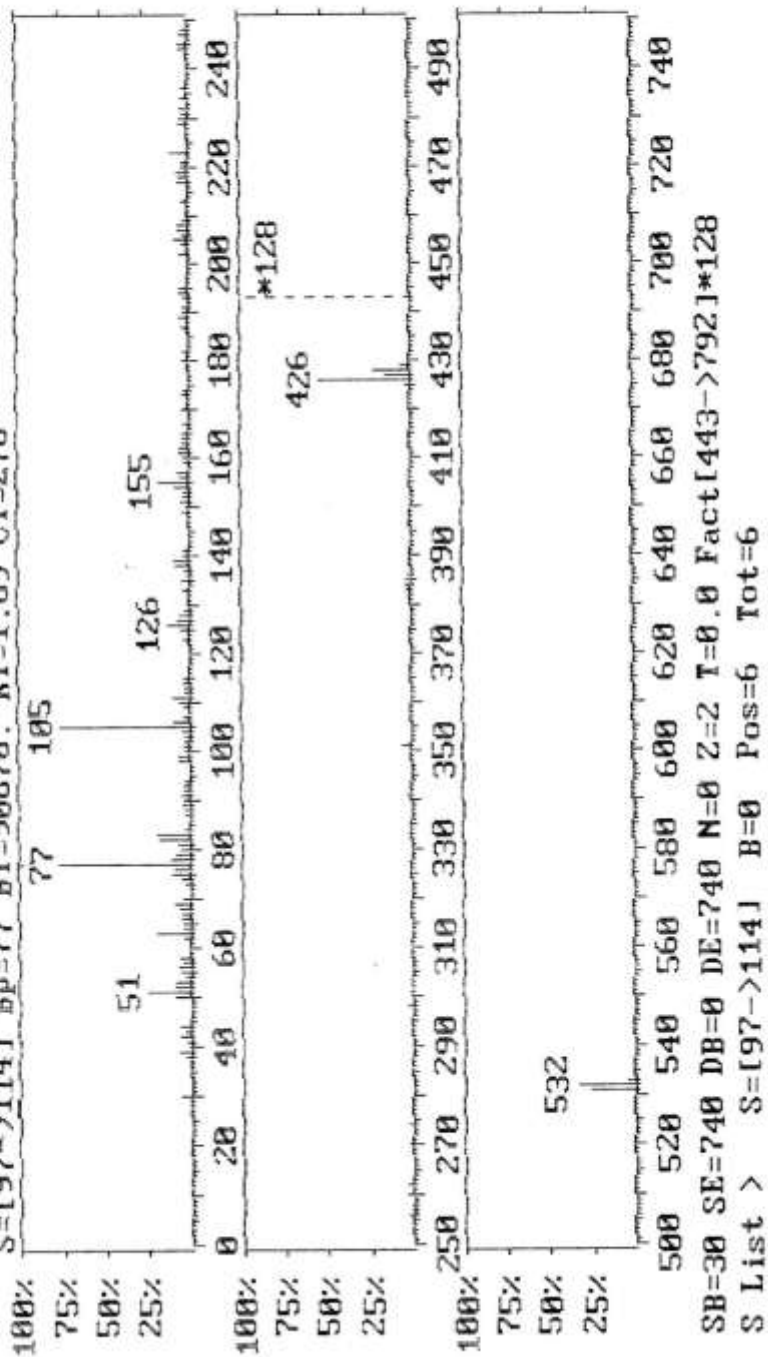

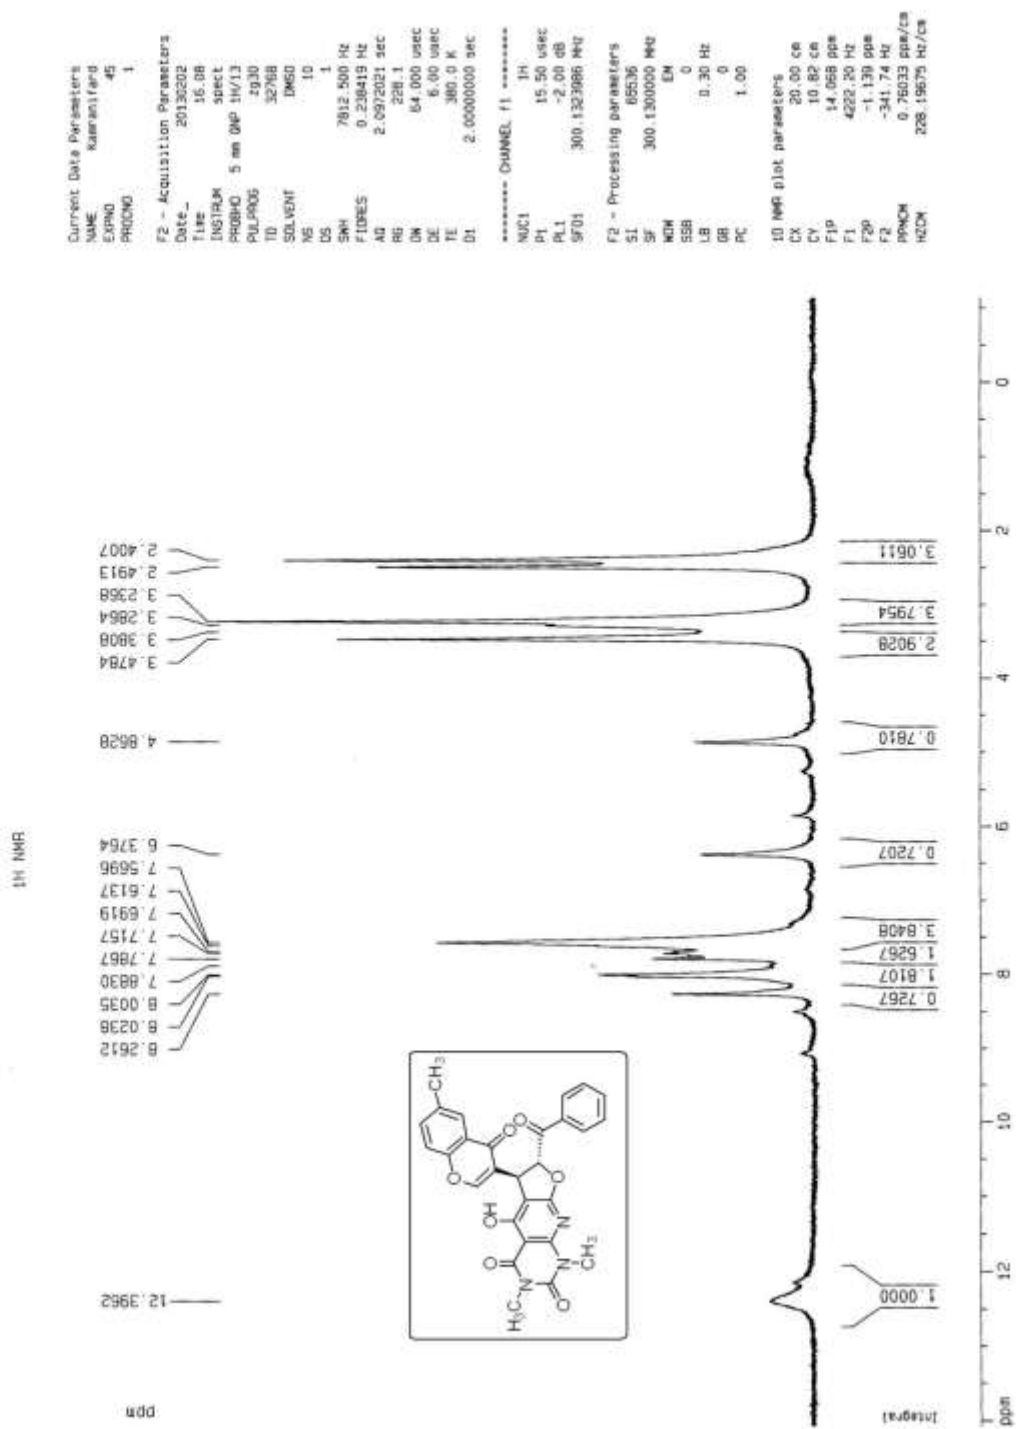

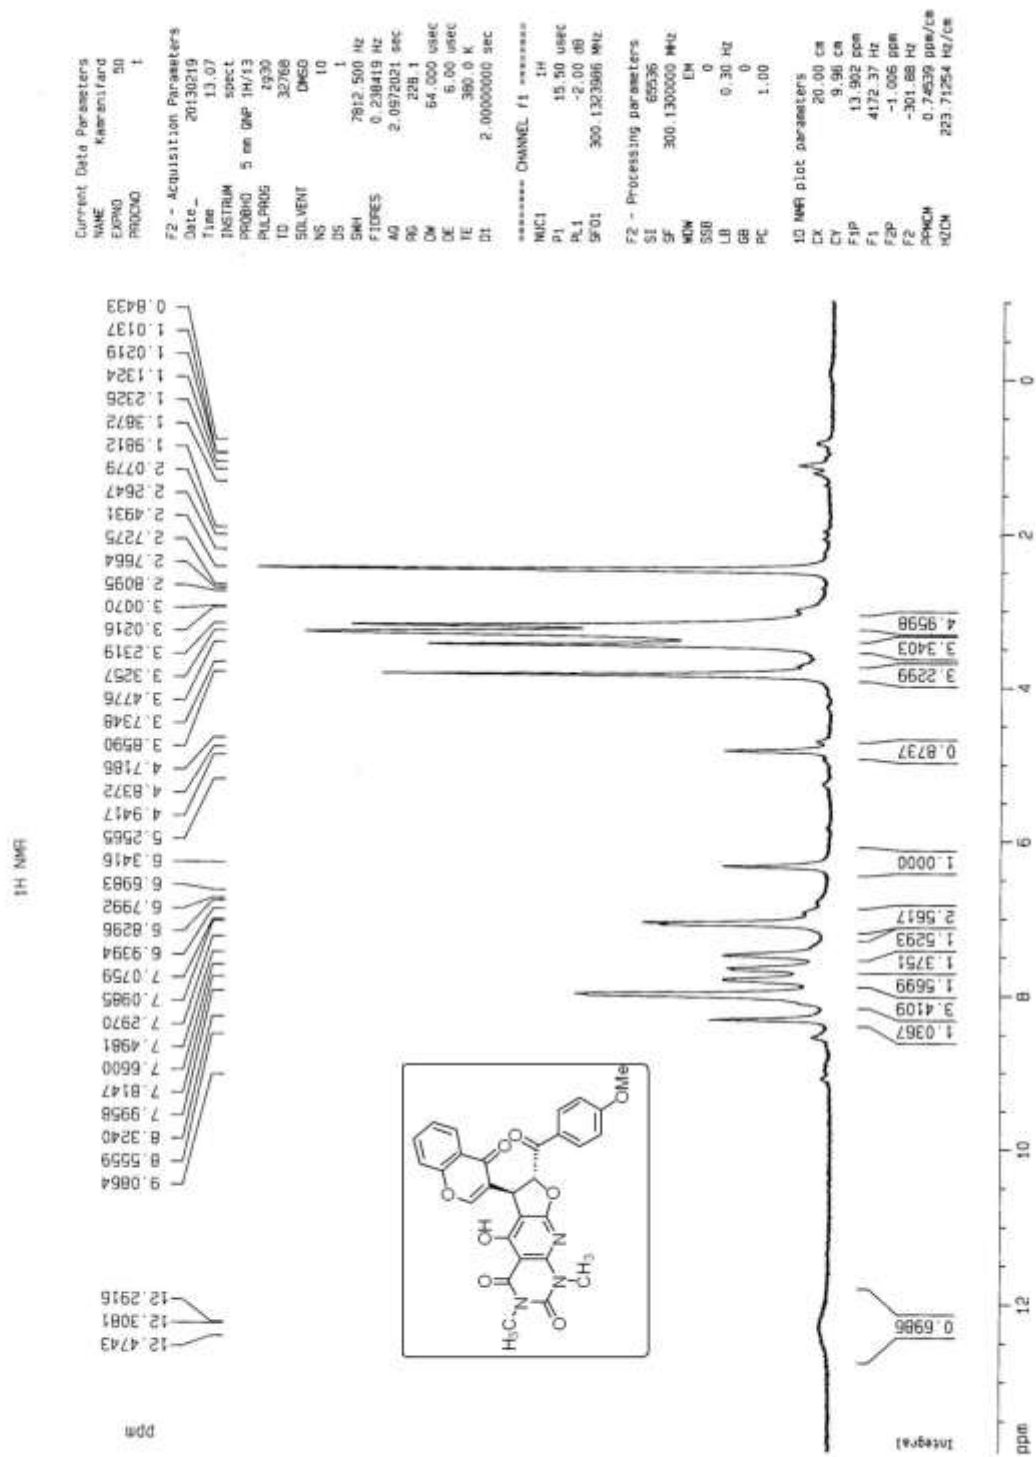

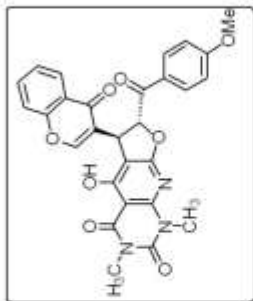

DI/KAMRANIFARD-CROME/92.01.24  
File : DI\_91.X12 Date 5/ 7/81 Time 11:33:40  
S=[110->135] Bp=135 Bi=137770. RT=2.24 CI=298

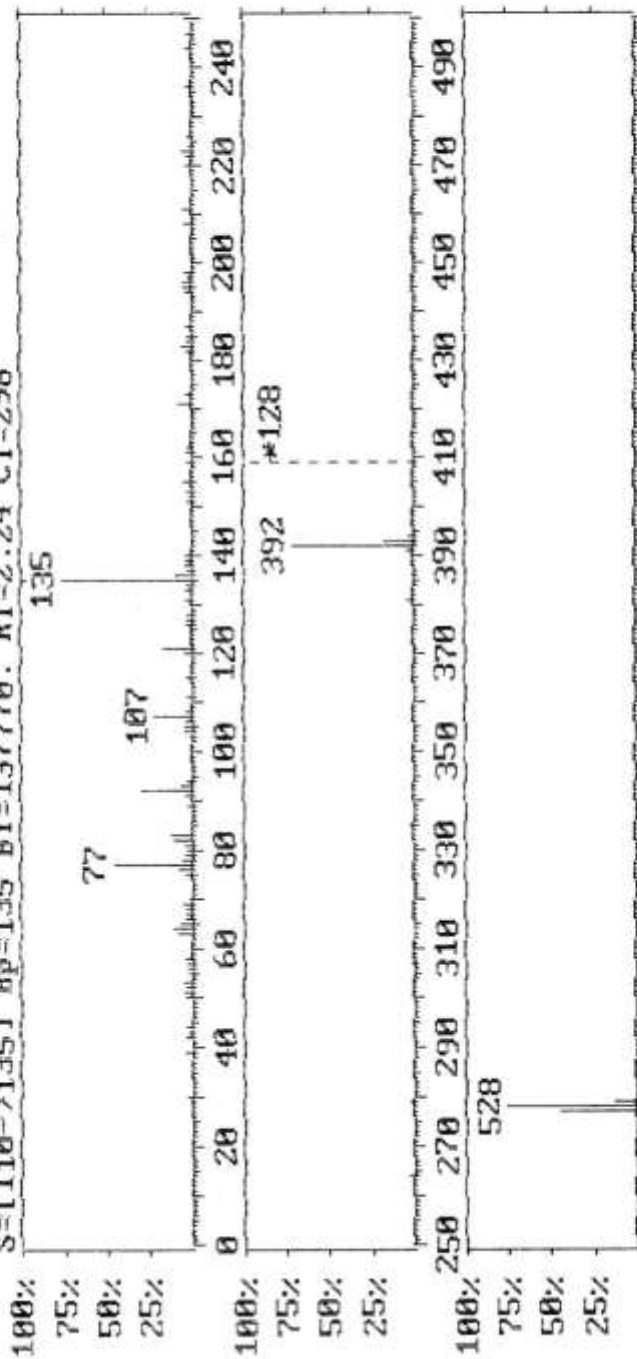

SB=30 SE=730 DB=0 DE=730 N=0 Z=2 T=0.0 Fact[489->744]\*128  
S List > S=[110->135] B=0 Pos=4 Tot=4

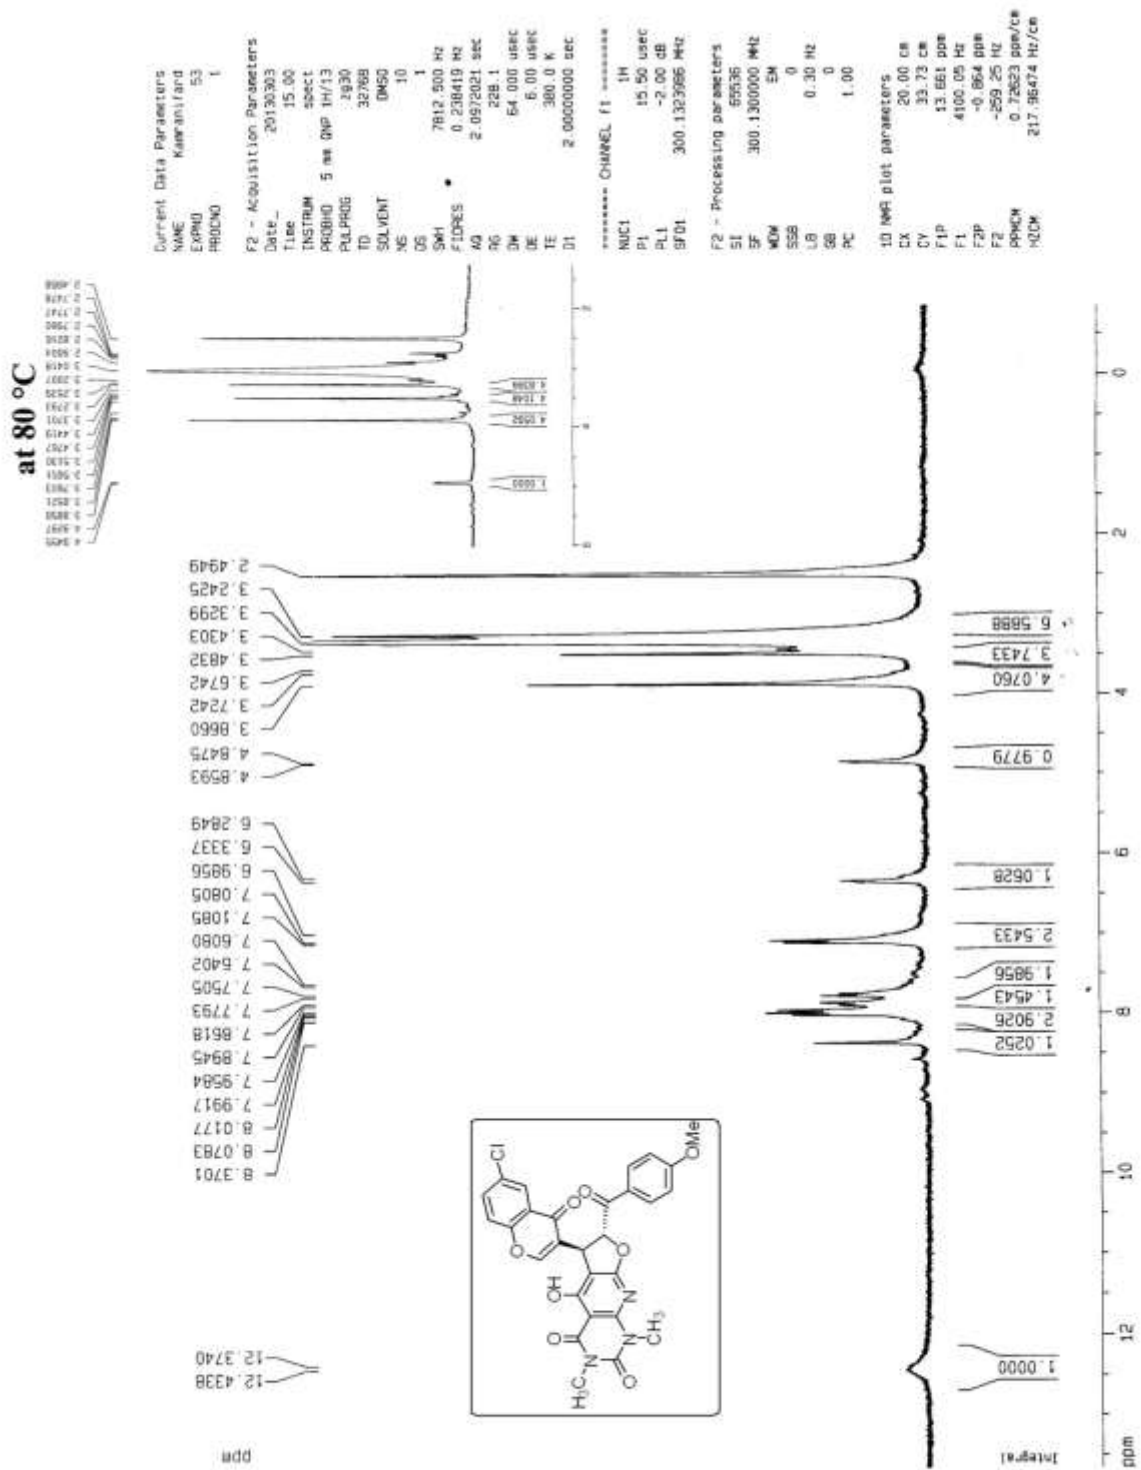

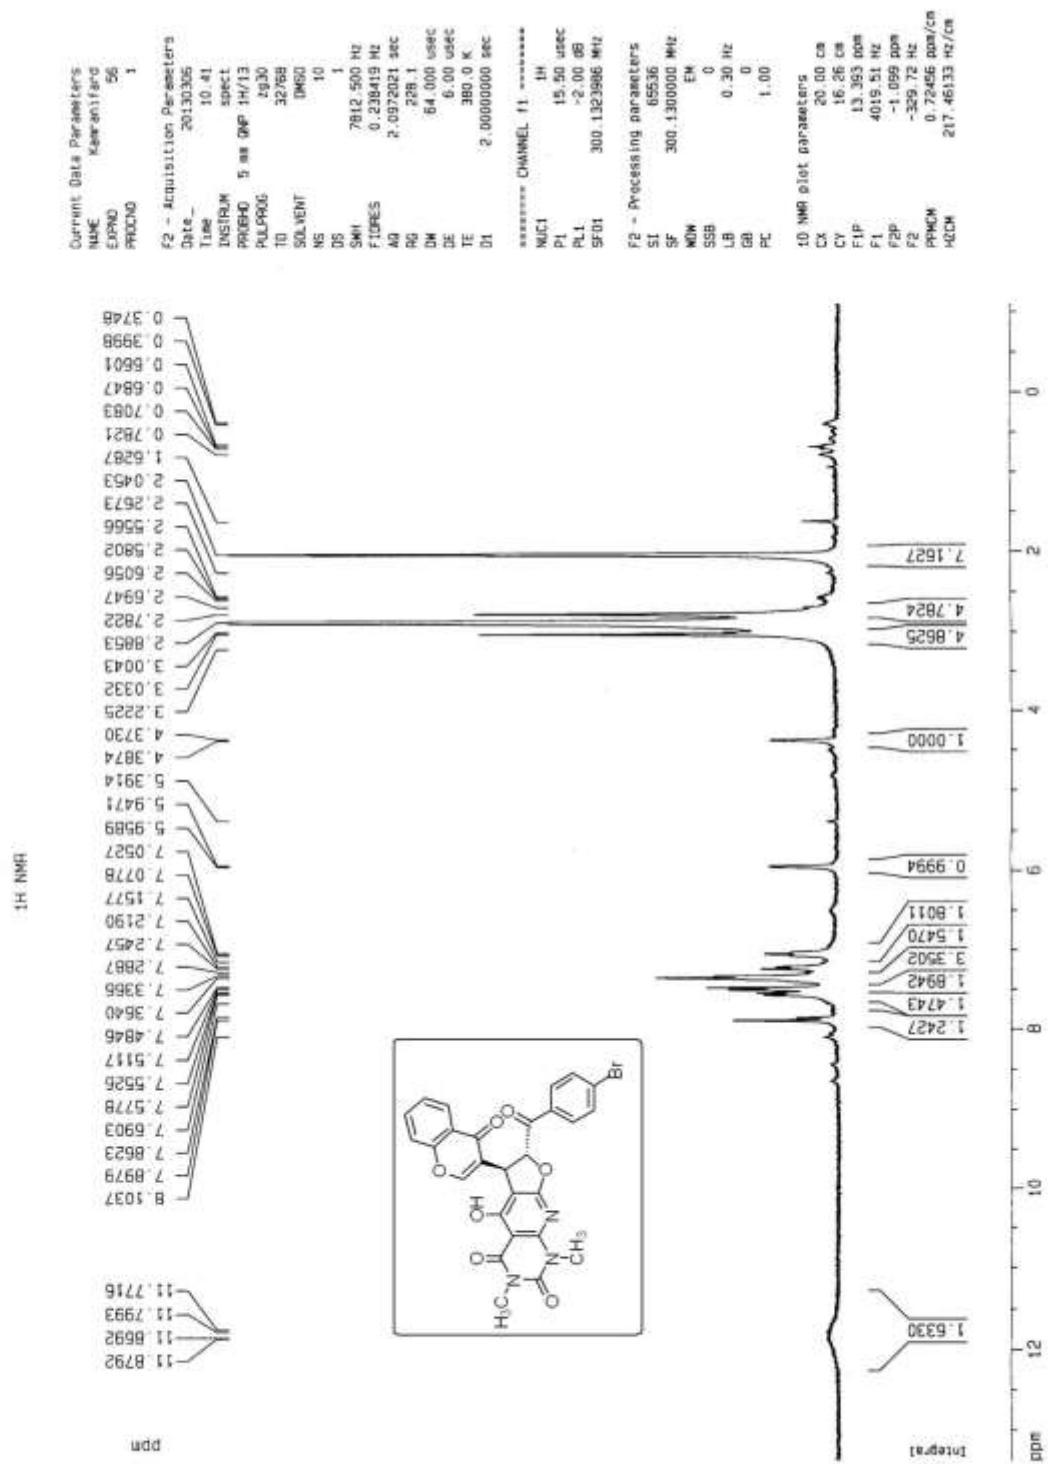

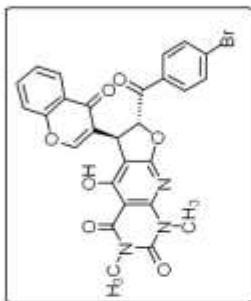

DI/KAMRANIFARD-BPCR/92.01.24'  
File : DI\_91.X13 Date 5/ 7/81 Time 11:45:58  
S=[143->173] Bp=392 Bi=57900. RT=2.87 CI=335

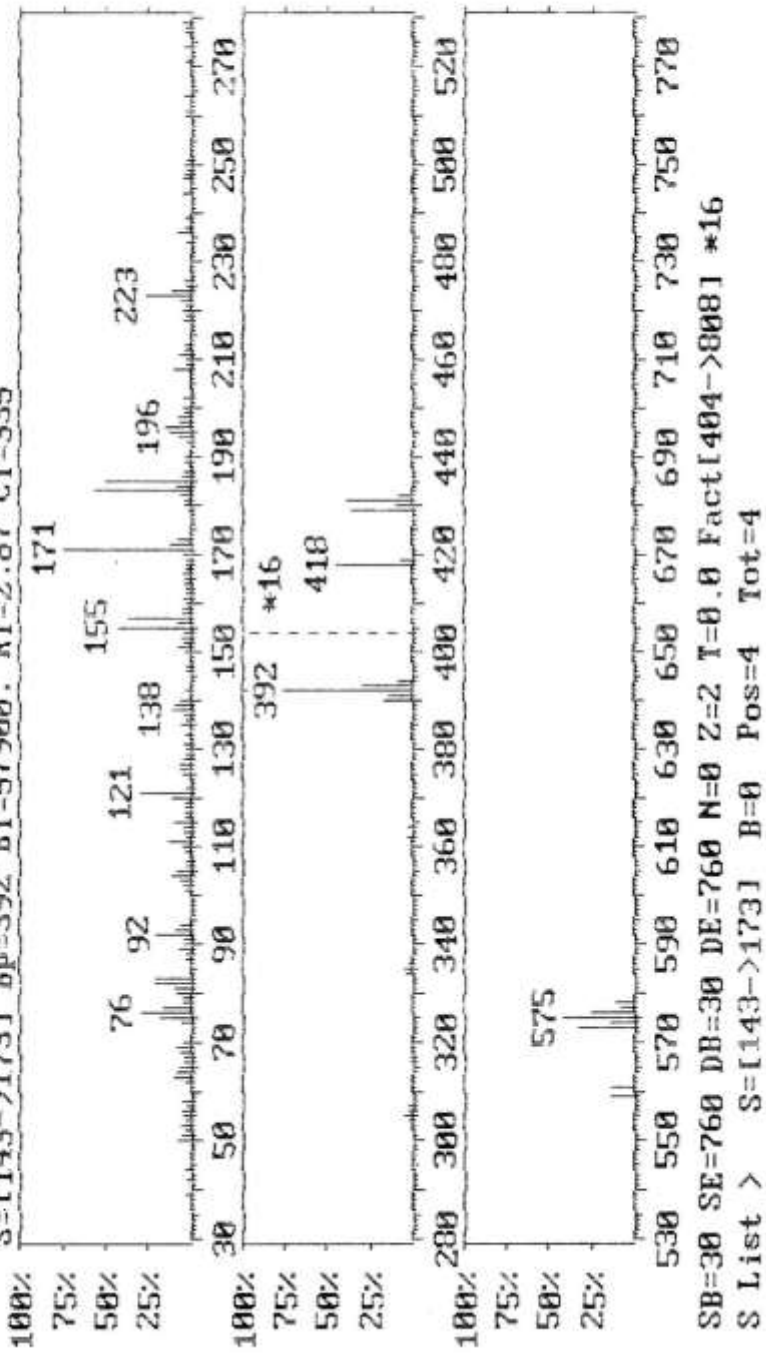

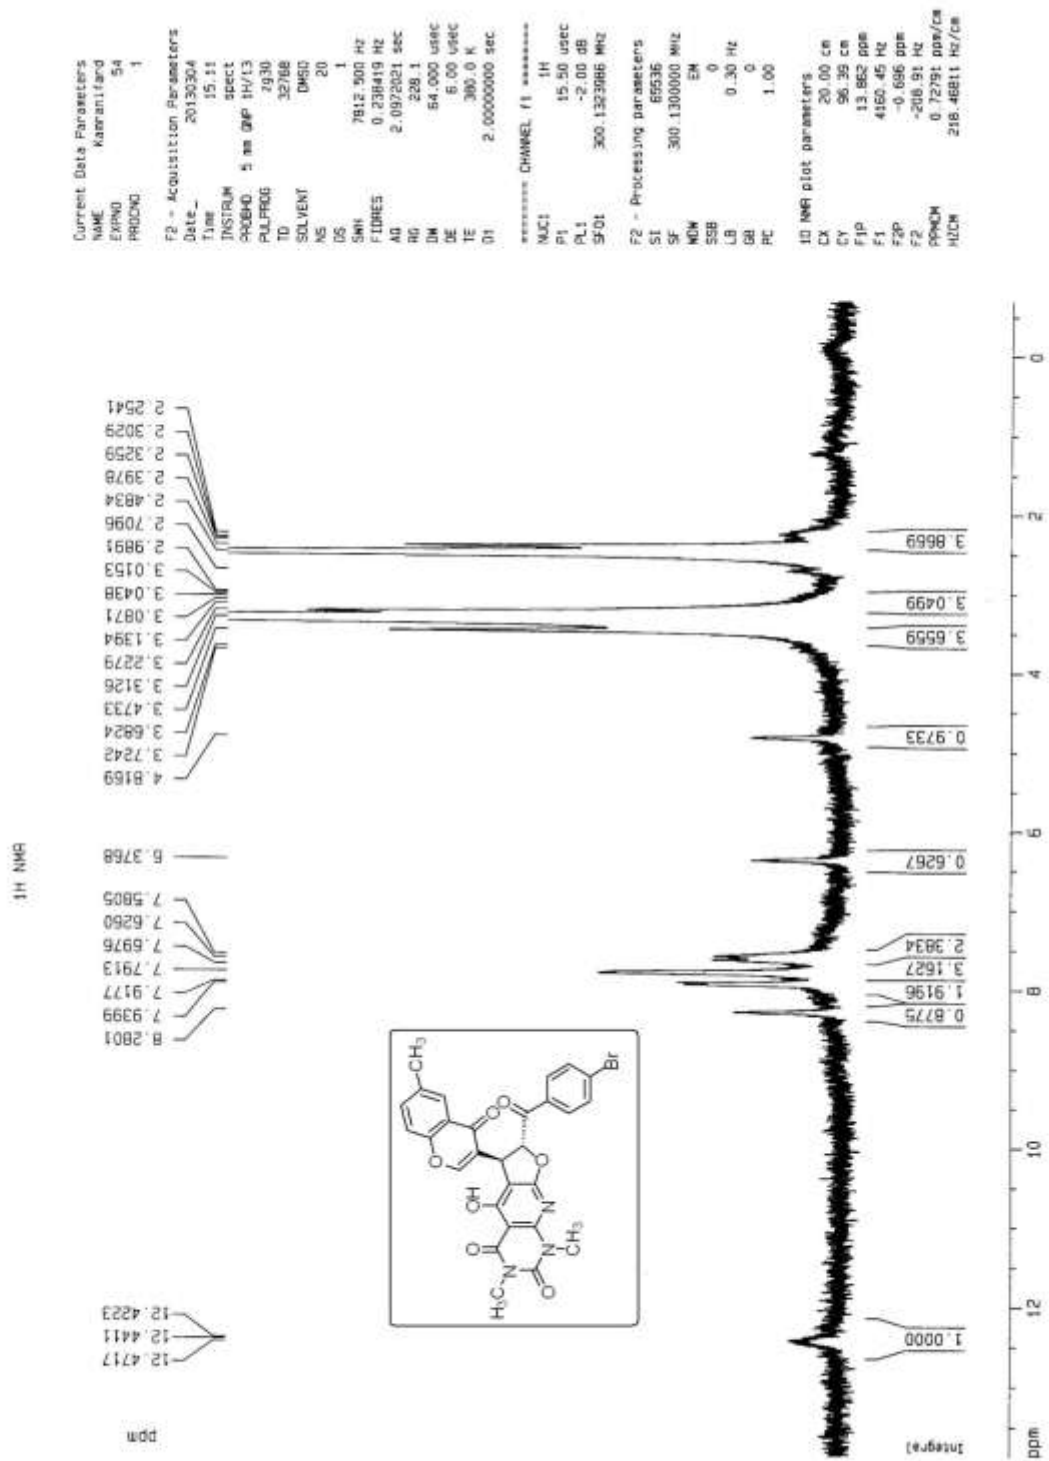

Supplement: c3ra45795h.pdf [file c3ra45795h.pdf]
